# Supplementary material for: Evidence base for an intervention to maximise uptake of glaucoma testing: a theory-based cross-sectional survey
Source: PubMed Central journal article supplement — BMJ Open. 2012 Mar 1;2(2):e000710. doi: 10.1136/bmjopen-2011-000710 (PMC3293143; doi:10.1136/bmjopen-2011-000710), 2012-03-01
Supplement: bmjopen-2011-000710.draft_revisions.pdf [file bmjopen-2011-000710.draft_revisions.pdf]

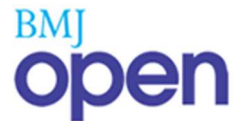

**Evidence base for an intervention to maximise uptake of glaucoma testing: A theory based cross-sectional survey**

|                                 |                                                                                                                                                                                                                                                                                                                                                                                                                                                                 |
|---------------------------------|-----------------------------------------------------------------------------------------------------------------------------------------------------------------------------------------------------------------------------------------------------------------------------------------------------------------------------------------------------------------------------------------------------------------------------------------------------------------|
| Journal:                        | <i>BMJ Open</i>                                                                                                                                                                                                                                                                                                                                                                                                                                                 |
| Manuscript ID:                  | bmjopen-2011-000710                                                                                                                                                                                                                                                                                                                                                                                                                                             |
| Article Type:                   | Research                                                                                                                                                                                                                                                                                                                                                                                                                                                        |
| Date Submitted by the Author:   | 06-Dec-2011                                                                                                                                                                                                                                                                                                                                                                                                                                                     |
| Complete List of Authors:       | Prior, Maria; University of Aberdeen, Health Services Research Unit<br>Burr, Jennifer; University of Aberdeen, Health Services Research Unit<br>Ramsay, Craig; University of Aberdeen, Health Services Research Unit<br>Jenkinson, David; University of Birmingham, School of Health & Population Sciences<br>Campbell, Susan; University of East Anglia, School of Nursing Sciences<br>Francis, Jillian; University of Aberdeen, Health Services Research Unit |
| <b>Primary Subject Heading</b>: | Health services research                                                                                                                                                                                                                                                                                                                                                                                                                                        |
| Secondary Subject Heading:      | Ophthalmology                                                                                                                                                                                                                                                                                                                                                                                                                                                   |
| Keywords:                       | Glaucoma < OPHTHALMOLOGY, Health behaviour, Screening behaviour, Intention, Planned behaviour, Behavioural self-regulation                                                                                                                                                                                                                                                                                                                                      |
|                                 |                                                                                                                                                                                                                                                                                                                                                                                                                                                                 |

SCHOLARONE™  
Manuscripts

1  
2  
3  
4  
5  
6  
7  
8  
9  
10  
11  
12

## Evidence base for an intervention to maximise uptake of glaucoma testing: A theory based cross-sectional survey.

13  
14  
15  
16  
17  
18  
19  
20  
21  
22  
23  
24  
25  
26  
27

Maria Prior *Research Fellow in Health Services Research*<sup>1</sup>, Jennifer M Burr *Senior Clinical Research Fellow (Ophthalmology)*<sup>1</sup>, Craig R Ramsay *Professor in Healthcare Assessment*<sup>1</sup>, David Jenkinson *Research Fellow in Statistics*<sup>2</sup>, Susan Campbell *Lecturer in Health Services Research*<sup>3</sup>, Jillian J Francis *Reader in Health Psychology*<sup>1</sup> for the Glaucoma screening Platform Study group

14  
15  
16

<sup>1</sup> Health Services Research Unit, University of Aberdeen, 3<sup>rd</sup> floor Health Sciences Building, Foresterhill, Aberdeen AB25 2ZD, UK

17  
18  
19

<sup>2</sup> School of Health & Population Sciences, 1<sup>st</sup> Floor, 90 Vincent Drive, University of Birmingham, Edgbaston, Birmingham, B15 2TT, UK

20  
21  
22  
23

<sup>3</sup> School of Nursing Sciences, Edith Cavell Building, University of East Anglia, Norwich Research Park, Norwich NR4 7TJ, UK

24  
25  
26  
27

Correspondence to: Jill Francis [j.francis@abdn.ac.uk](mailto:j.francis@abdn.ac.uk) Tel: 01224 438145 Fax: 01224 438165

28  
29

### KEYWORDS

30  
31  
32  
33  
34  
35

Glaucoma; health behaviour; screening behaviour; intention; planned behaviour; behavioural self-regulation

36  
37  
38  
39  
40  
41  
42  
43  
44  
45  
46  
47  
48  
49  
50  
51  
52  
53

### ABSTRACT

38  
39  
40  
41  
42  
43

**Objective.** To identify factors associated with intention to attend a hypothetical eye health test, and provide an evidence base for developing an intervention to maximise attendance, for use in studies evaluating glaucoma screening programmes.

44  
45  
46  
47  
48

**Design.** Theory based cross-sectional survey, based on an extended Theory of Planned Behaviour (TPB) and the Common Sense Self-Regulation Model (CS-SRM), conducted in June 2010.

49  
50  
51

**Participants.** General population including oversampling from low socioeconomic areas.

52  
53

**Setting.** Aberdeenshire and the London Boroughs of Lewisham and Southwark; UK.

54  
55  
56  
57  
58  
59  
60

**Results.** From 867 questionnaires posted, 327 questionnaires were returned completed (38%). In hierarchical regression analysis the three theoretical predictors in the Theory of Planned Behaviour (Attitude, Subjective norm and Perceived Behavioural Control) accounted for two-thirds of the variance in intention scores (adjusted  $R^2=0.65$ ). All three predictors

1  
2  
3  
4  
5  
6  
7  
8  
9  
10  
11  
12  
13  
14  
15  
16  
17  
18  
19  
20  
21  
22  
23  
24  
25  
26  
27  
28  
29  
30  
31  
32  
33  
34  
35  
36  
37  
38  
39  
40  
41  
42  
43  
44  
45  
46  
47  
48  
49  
50  
51  
52  
53  
54  
55  
56  
57  
58  
59  
60

contributed significantly to prediction. Adding Anticipated regret as a factor in the TPB model resulted in a significant increase in prediction (adjusted  $R^2=0.74$ ). In the CS-SRM, only illness representations about the personal consequences of glaucoma (*How much do you think glaucoma would affect your life?*) and illness concern (*How concerned are you about getting glaucoma?*) significantly predicted. The final model explained 75% of the variance in intention scores, with ethnicity significantly contributing to prediction.

**Conclusions** In this population-based sample (including over-representation of lower socioeconomic groupings), the predictors of intention to attend for testing to detect glaucoma were Attitude, Perceived control over attendance, Anticipated regret if did not attend, and black ethnicity. This evidence informs the design of a behavioural intervention with intervention components targeting low intentions and predicted to influence health related behaviours.

## ARTICLE SUMMARY

### Article focus

- The current UK practice of opportunistic case finding during routine sight tests misses a majority of those with glaucoma. Early detection and treatment of glaucoma reduces the risk of blindness.
- The feasibility and cost-effectiveness of screening programmes is largely determined by uptake by the target population.
- This study identified empirical evidence, based on models of behaviour change, to inform the design of an intervention to maximise uptake, thereby increasing the chance of addressing identified, rather than assumed, barriers to uptake.

### Key messages

- Intention to attend an eye health check to detect glaucoma is associated with positive Attitude, perceived control over screening attendance, Anticipated regret if test is not attended, perceived consequences of glaucoma and black ethnicity. These factors can be targeted in an intervention to maximise uptake.

### Strengths and limitations of this study

- This study is the largest of its kind and uses a robust methodology based on plausible models of change to identify potential barriers to attendance for eye care.
- The response rate was 38%, which is higher than generally achieved in similar population-based surveys.

1  
2  
3  
4  
5  
6  
7  
8  
9  
10  
11  
12  
13  
14  
15  
16  
17  
18  
19  
20  
21  
22  
23  
24  
25  
26  
27  
28  
29  
30  
31  
32  
33  
34  
35  
36  
37  
38  
39  
40  
41  
42  
43  
44  
45  
46  
47  
48  
49  
50  
51  
52  
53  
54  
55  
56  
57  
58  
59  
60

- There was evidence to suggest that this sample was representative of the target population (general population with over-representation of Black ethnicity or of low socio-economic status).

For peer review only

## INTRODUCTION

1  
2  
3  
4  
5  
6  
7  
8  
9  
10  
11  
12  
13  
14  
15  
16  
17  
18  
19  
20  
21  
22  
23  
24  
25  
26  
27  
28  
29  
30  
31  
32  
33  
34  
35  
36  
37  
38  
39  
40  
41  
42  
43  
44  
45  
46  
47  
48  
49  
50  
51  
52  
53  
54  
55  
56  
57  
58  
59  
60

Glaucoma is a leading cause of avoidable and irreversible blindness worldwide.[1] In the UK, glaucoma is second to macular degeneration as the most common cause of blindness. If glaucoma is identified early, treatment is effective at reducing progressive disease.[2] It is estimated, based on a synthesis of the available evidence, that the current UK practice of opportunistic case finding during routine sight tests misses a majority of those with glaucoma.[3] Identified risk factors for developing the most common form of glaucoma (open angle glaucoma) include: age (> 60 years), family history of glaucoma in a first degree relative, myopia, diabetes and black ethnicity.[3] Late presentation, older age and poor adherence to treatment are important determinants of blindness.[4-6] Late presentation may be due to patient delay in terms of attendance for testing, process delay in terms of missed diagnosis, or system delay leading to delayed access to treatment.[7] There is evidence to suggest that uptake of eye care services may be lower in groups at risk of glaucoma blindness. In the UK, uptake of current eye care services is lower in black ethnic groups (38% of those aged 55 years and over, compared to 80% of the same age group in the general population).[8] In addition, lower socioeconomic groups and/or black and other ethnic minority groups are less likely to attend for health promotion and preventative services more generally.[9,10]

Considering the public health importance of glaucoma and that early detection and treatment reduce the risk of blindness, a screening programme could be considered.[11] However, there is insufficient evidence from high quality studies that the benefits of glaucoma screening or enhanced case detection programmes outweigh any potential harms (such as raising anxiety levels).[3] Such evidence would be best gathered in the context of a randomised controlled trial (RCT).[11] For public health programmes, a major determinant of both feasibility and cost-effectiveness is the level of uptake by the target population.[12] Uptake involves intentional behaviour (e.g. intend to go to screening appointment) and is likely to be influenced by the way people think (i.e., their cognitions) about the action (attending an eye test) or the condition (glaucoma). We investigated the factors that predict intention to attend an 'eye health test', based on (1) the Theory of Planned Behaviour (TPB) [13] and (2) the Common Sense Self-

1 Regulation Model (CS-SRM).[14] The TPB proposes that intentions are determined by Attitude  
2 (beliefs about whether the benefits outweigh the costs), Subjective norm (perceived normative  
3 pressures) and Perceived control over the behaviour. There is consistent evidence that adding  
4 Anticipated regret as a factor (i.e. beliefs about whether feelings of regret will follow from  
5 inaction) to the TPB model increases prediction of intention and behaviour.[15] The model  
6 including Anticipated Regret is hereafter referred to as the extended TPB model. The CS-SRM  
7 proposes that cognitive representations (a 'mental picture') or emotional representations  
8 (worry or concern) about a health threat lead to behaviours that assist in coping with the  
9 threat. Ideally, an intervention to maximise uptake of a screening programme would be based  
10 on empirical evidence of an association between these cognitive or emotional factors and  
11 intention to attend the eye test, to ensure that the intervention is based on identified (rather  
12 than assumed) barriers to uptake. Therefore we conducted a study to identify the predictors of  
13 intention to attend for eye testing, using the factors proposed by the extended TPB to predict  
14 intention and the factors proposed by the CS-SRM to lead to coping behaviours. Specifically,  
15 we investigated the associations between intention to attend an eye test and:  
16  
17  
18  
19  
20  
21  
22  
23  
24  
25  
26  
27  
28  
29  
30  
31

- 32 1. measures of how people think about attending an 'eye health test' (Intention, Attitude,  
33 Subjective norm, Perceived Behavioural Control, Anticipated regret)
- 34 2. measures of how people think and feel about glaucoma (illness representations i.e.  
35 Consequences, Timeline, Personal control, Treatment control, Identity, Concern,  
36 Coherence, Emotional representation)
- 37 3. other personal attributes (i.e. socio-demographic variables that are known risk factors  
38 for glaucoma and knowledge of glaucoma)

39 Identified predictors would provide an evidence base for developing a behavioural intervention  
40 to maximise uptake of glaucoma screening or enhanced case detection programmes.  
41  
42  
43  
44  
45  
46  
47  
48  
49  
50  
51  
52  
53  
54  
55  
56  
57  
58  
59  
60

## METHODS

### Study design and population

We used a cross sectional survey design to identify factors associated with intention to attend an eye health test, among members of the general population on the edited electoral register in two geographic locations: Aberdeenshire and the London Boroughs of Lewisham and Southwark. The initial sample was obtained from a commercial company specialising in the supply of publically available data (names and addresses) for use in research.[16] We requested a sample that was systematically biased towards people over forty years of age, in lower socioeconomic groups and/or of African-Caribbean ethnicity.[3,17] We used the Index of Multiple Deprivation 2007 (IMD) and the Scottish Index of Multiple Deprivation (SIMD) to independently assess the socioeconomic status of the initial sample. These indices provide relative ranking of geographic areas (data zones) within England or Scotland according to levels of deprivation. The IMD is based on 37 different indicators of deprivation, weighted and combined to give a relative ranking for data zones ranging from most deprived (Rank 1) to least deprived (Rank 32482). The SIMD uses different indicators to the IMD, but provides a relative rank for Scottish data zones ranging from most deprived (Rank 1) to least deprived (Rank 6505).

### Materials

We used a questionnaire based on the extended TPB and the CS-SRM to identify factors associated with intention to attend an eye health test. Twenty factors were measured: four from the TPB; eight from the CS-SRM and eight medical and demographic factors (see below). We used the phrase 'new eye health test' and not 'glaucoma screening test' in the questionnaire to minimise anxiety that may be caused if the selected members of the public mistakenly believed that we had approached them after identifying an underlying 'problem' with their eyes.

The questionnaire was presented in three sections. Section A contained 18 items based on the components of the extended TPB (Intention, Attitude, Subjective Norm, Perceived

1 Behavioural Control and Anticipated regret), with items measured on seven-point response  
2 scales with consistent direction (i.e. high scores indicating high intention, PBC and Anticipated  
3 regret, positive Attitude and more positive normative pressures). Items designed to assess the  
4 same construct were separated and presented in a non-systematic order (in accordance with  
5 TPB guidance).[13,18] Examples of Section A items are shown in Table 1. The full  
6 questionnaire is available in supplementary file 1. Section B (Table 1) assessed illness  
7 representations and emotional representations about glaucoma using items adapted from the  
8 Brief Illness Perceptions Questionnaire (Brief IPQ).[19] The Brief IPQ is a validated  
9 questionnaire that measures the components of the CS-SRM that are proposed to influence  
10 health-related coping behaviour. Rewording of items for specific conditions and for people  
11 without a diagnosis are part of the standard use of the questionnaire [20] and items in Section  
12 B were adapted to be appropriate to this study. Each item assesses a different domain of  
13 illness representations, on a 10-point scale, and each is analysed separately.[19] An item  
14 assessing knowledge of the term glaucoma (*Have you heard of the eye condition glaucoma?*)  
15 preceded the Brief IPQ items in Section B.

16  
17  
18  
19  
20  
21  
22  
23  
24  
25  
26  
27  
28  
29  
30  
31  
32  
33 Section C of the questionnaire contained socio-demographic and general health items  
34 (gender; general health status; time since last eye test) and items to assess identified risk  
35 factors for glaucoma (age; diabetes, myopia; family history of glaucoma; and ethnicity). In  
36 addition, unique study identification numbers enabled us to identify the location (London or  
37 Aberdeenshire) and socioeconomic status of the invited sample and responders.

38  
39  
40  
41  
42  
43  
44 We pilot tested the questionnaire with two members of the general population to assess  
45 usability and identify any need for clarification of wording. This resulted in changes to the  
46 instruction sheet to emphasise our interest in the honest opinions of participants and not  
47 socially desirable responses.

## 48 49 50 51 52 53 **Procedure**

54  
55 The questionnaire was mailed to 867 potential participants (421 in London and 446 in  
56 Aberdeenshire) in June 2010 together with an information letter (see supplementary file 2) and  
57  
58  
59  
60



1  
2  
3  
4  
5  
6  
7  
8  
9  
10  
11  
12  
13  
14  
15  
16  
17  
18  
19  
20  
21  
22  
23  
24  
25  
26  
27  
28  
29  
30  
31  
32  
33  
34  
35  
36  
37  
38  
39  
40  
41  
42  
43  
44  
45  
46  
47  
48  
49  
50  
51  
52  
53  
54  
55  
56  
57  
58  
59  
60

reply paid envelope. One reminder was sent to non-responders two weeks later. The return of a completed questionnaire was considered as consent to take part. Ethical approval for the survey was obtained from the University of Aberdeen College of Life Sciences and Medicine Ethics Review Board (Ref: CERB/2010/4/507). The postal survey reported in this paper formed part of a larger study to assess the feasibility of conducting a RCT of glaucoma screening.[21]

### **Sample size and statistical analyses**

Multiple regression approaches were used to identify factors associated with intention to attend a hypothetical eye health test. The recommended minimum sample is calculated as  $50 + 8m$ , where  $m$  is the number of predictor variables.[22] This study design involved a total of 20 potential predictor variables and the minimum sample size required was thus 210.

The internal consistency of each multi-item measure was assessed using Cronbach's alpha (for measures with three or more items) and Pearson's correlation coefficient (for the 2-item measure of Anticipated regret), using an acceptability criterion of  $\alpha > 0.65$ , and  $r > 0.5$  respectively.[23] In addition, measures of central tendency and dispersion were computed for measures in Sections A and B.

The primary analysis addressed the prediction of intention to attend an eye health test. A 4-step hierarchical regression analysis explored the predictive value of (1) the TPB measures; (2) Anticipated regret; (3) the Brief IPQ measures and (4) socio-demographic and general health variables in explaining variance in participants' intention to attend a test. Variables that did not contribute significantly to the model ( $p > 0.05$ ) at their point of entry were excluded in later steps. The TPB constructs were entered at Step 1 as these are proposed by the theory to be the proximal predictors of intention. Anticipated regret was added at Step 2 as this variable represents an extension of the TPB. Step 3 involved the addition of the Brief IPQ items (as they represent cognitions at a more contextual level). At Step 4, demographic and general health variables were added (as they represent the broader personal context in which screening behaviour would be performed). Prior to inclusion in the model, independent-sample

1 t-tests were performed to compare intention scores of dichotomised demographic and general  
2 health variables. Only those variables for which there was a significant difference in intention  
3 scores were added to the regression model at Step 4. There was no imputation of missing  
4 data.  
5  
6  
7  
8  
9

## 10 RESULTS

### 11 Response rates and responder characteristics

12  
13  
14 Of the 867 questionnaires sent out, 327 completed questionnaires were returned, representing  
15 a response rate of 38%. The response rate differed by geographical area with London  
16 achieving 24% (101/421) and Aberdeenshire 51% (226/446). Of the 11,445 possible data  
17 points in the returned questionnaire, 2.1% of data were missing. The mean (sd) age of  
18 respondents was 54 (12) years. The socioeconomic status of respondents, in both locations  
19 was representative of those sampled and achieved the desired weighting towards people in  
20 lower socioeconomic groups: mean IMD rank of the London sample was 4818 versus 4809 for  
21 respondents; mean SIMD of the Aberdeenshire sample was 2818 versus 2914 for  
22 respondents. The most commonly reported health status was 'good' (41%). Ten percent of  
23 the sample reported Black ethnicity (Table 2) and 81% reported having an eye test within the  
24 previous three years.  
25  
26  
27  
28  
29  
30  
31  
32  
33  
34  
35  
36  
37

38 Table 2 here

39  
40 Internal consistency of the extended TPB measures was satisfactory with reliabilities  
41 (Cronbach's alpha) of the Intention, Attitude, Subjective norm and PBC scales > 0.65 and the  
42 Anticipated regret scale > 0.5 (Pearson correlation coefficient). Summary statistics for each  
43 variable are shown in Table 3. All variables representing the extended TPB had medians > 6.3  
44 (on a scale of 1 to 7) suggesting potential ceiling effects (generally positive views and  
45 intentions). Although intention was generally high (Figure 1), there was still a substantial  
46 proportion of respondents (54.7%) who reported a mean intention score < 7, indicating some  
47 reservation in their intention to attend. All measures of the CS-SRM variables, apart from  
48  
49  
50  
51  
52  
53  
54  
55  
56  
57  
58  
59  
60

1 Treatment control, had medians > 5 (on a scale of 1 to 10), representing generally negative  
2 representations about glaucoma (Table 3).  
3  
4

5  
6 Table 3 here  
7

8  
9 Figure 1 here  
10

11 The Pearson correlations between intention to attend an eye health test and the theoretical  
12 predictor variables are shown in Table 3. Higher intention to attend was significantly  
13 associated with all the predictors as proposed by the theories.  
14  
15  
16

17 Intention scores for groups defined by demographic and general health variables are shown in  
18 Table 4. There was a significant difference in the intention scores for respondents of Black and  
19 non-Black ethnicity and for respondents who reported they had heard of glaucoma compared  
20 with those who had not. Both variables were therefore included in the regression model at  
21 Step 4. The other five variables in Table 4 were excluded. A further risk factor for glaucoma,  
22 the continuous variable 'age', was also entered at Step 4 as it was highly correlated with  
23 intention to attend an eye health screening test (Spearman's rank correlation coefficient =  
24 0.155, p=0.006).  
25  
26  
27  
28  
29  
30  
31  
32  
33  
34

35  
36 Table 4 here  
37

38 The results of the hierarchical regression analysis are presented in Tables 5 and 6. At Step 1,  
39 the three theoretical predictors of the TPB (Attitude, Subjective norm and PBC) accounted for  
40 two-thirds of the variance in intention scores (adjusted  $R^2 = 0.65$ ) and all three predictors  
41 contributed significantly to prediction. The addition of Anticipated regret at Step 2 resulted in a  
42 significant increase in prediction (adjusted  $R^2 = 0.74$ ). At Step 3, only representations about  
43 consequences of the condition (*How much do you think glaucoma would affect your life?*) and  
44 illness concern (*How concerned are you about getting glaucoma?*) significantly predicted. The  
45 final model (Step 4) explained 75% of the variance in intention scores, with ethnicity  
46 significantly contributing to prediction.  
47  
48  
49  
50  
51  
52  
53  
54  
55  
56

57  
58 Tables 5 and 6 here  
59  
60

## DISCUSSION

This study showed that, in this population-based sample, intention to attend an eye health test was relatively high and was related to Attitude, Subjective norm, Perceived Behavioural Control, Anticipated regret, perceived consequences of having glaucoma and ethnicity. In other words, people who reported that they were *in favour* of attending an eye health test, that other people would *approve* of their attending, that they would be *able* to attend and that they would *regret* not attending were more likely to report strong intention to attend such a test. (The effect size for the association between Subjective norm and intention was small, so Subjective norm will not be considered further). The prediction of intention was higher than is usually reported in studies of the TPB (e.g. commonly, TPB-based studies explain around 40% of the variation in intention).[24] People who reported that glaucoma would negatively affect their life (*consequences of glaucoma*) were also more likely to report strong intention to attend an eye health test, but the effect size was small. People of Black ethnicity, who are known to be at increased risk of developing glaucoma, were less likely than those of other ethnicities to report strong intention to attend such a test. Intention was not uniquely predicted by knowledge or perceptions about glaucoma, nor was it associated with age when analysed with the other predictors. This pattern of findings can be used as an evidence base for developing an intervention to be evaluated in a possible population-based screening trial.

### **Implications of this evidence base for designing a behavioural component of a complex intervention to improve glaucoma detection**

Intention scores were generally high, as were measures of other variables that represented the way people thought about attending a hypothetical eye health test. The data indicate that a large proportion of this sample was highly receptive to the idea of an eye health programme to detect glaucoma. High intention is thus possibly not a barrier to uptake of a screening programme for the majority of this sample. However, there was still a substantial proportion of the sample (54.7%) who reported some uncertainty about their intention. Such individuals may benefit from an intervention to increase their motivation. The distribution of intention scores

1 (median of 6.7 on a 7-point scale) also indicated that many in the sample reported that they  
2 were highly motivated to re-arrange other priorities in order to attend a screening test. This is  
3 not to say that all people who strongly intend to attend would actually do so. We were unable  
4 to estimate the likely size of the 'intention-behaviour' gap for attendance at this hypothetical  
5 eye health test as a glaucoma screening programme is not current policy. However, the  
6 literature suggests that around 50% of people who intend to perform a health-related  
7 behaviour actually translate that intention into action.[25] So an intervention that targets "post-  
8 intentional" (action) processes would also be likely to increase uptake of a screening or  
9 enhanced case detection programme by assisting people to translate their high intentions into  
10 actual behaviour. The inclusion of non-modifiable socio-demographic and general health  
11 variables in the predictive model enabled us to determine if, in addition to targeting modifiable  
12 predictors of intention to attend an eye test, it would be appropriate to develop an intervention  
13 that is tailored to different socio-demographic groups (e.g. ethnic groups).  
14  
15  
16  
17  
18  
19  
20  
21  
22  
23  
24  
25  
26  
27  
28  
29

30 In summary, this evidence suggests that an intervention to increase motivation may be  
31 appropriate for nearly half of the population. In addition, tailoring of the intervention to increase  
32 motivation in people of Black ethnicity should be considered. An intervention to support the  
33 translation of motivation into action (i.e. actual attendance) would also be appropriate.  
34 Methods have recently been reported for developing interventions based on the evidence  
35 reported here.[26] Hence, it would be feasible to design an intervention to support both (1)  
36 motivation and (2) action. Such an intervention would include techniques such as (1)  
37 persuasive communication to target people's beliefs about the benefits of screening (i.e.  
38 Attitude, Anticipated regret) and factors likely to make it easier to attend the test (i.e. Perceived  
39 Behavioural Control) as well as (2) prompts and/or reminders (e.g. letters or phone calls) and  
40 contracts (i.e. written and signed agreements to perform a behaviour) that would make actual  
41 attendance more likely among those who are motivated to attend.  
42  
43  
44  
45  
46  
47  
48  
49  
50  
51  
52  
53  
54  
55

### 56 **Strengths and limitations of the study**

57  
58  
59  
60

1 This study is the largest of its kind and uses a robust methodology based on plausible models  
2 of change to identify potential barriers to attendance for eye care. We avoided the term  
3  
4 'glaucoma screening' in the participant information sheet and questionnaire, instead using the  
5  
6 phrase 'new eye health tests'. Our purpose was to minimise potential participant anxiety that  
7  
8 they had been specifically targeted in a research study about a serious condition. However,  
9  
10 the use of a generic description of the proposed eye test has generated results that are  
11  
12 applicable to development of interventions for improving attendance at eye care services more  
13  
14 generally.  
15  
16  
17  
18  
19

20 The response rate was 38%, which is higher than generally achieved in similar population-  
21  
22 based surveys.[27,28] There was evidence to suggest that this sample was representative of  
23  
24 the target population (general population with over-representation of Black ethnicity or of low  
25  
26 socio-economic status). First, the proportion of participants reporting having their eyes tested  
27  
28 in the last 3 years (81%) was consistent with findings in the general population.[8] Second, the  
29  
30 socioeconomic status and sample characteristics of responders and non-responders  
31  
32 suggested that responders were not distinguishable from non-responders on these variables  
33  
34 and the desired weighting towards people in lower socio-economic groups was achieved.  
35  
36 Furthermore, groups that might be at higher risk of developing glaucoma including hard-to-  
37  
38 reach groups were well represented in the sample. For example, 2.0% of the UK population  
39  
40 [29] but 10% of our sample are of Black ethnicity. In addition, there was a good spread of  
41  
42 general health status in the sample, but the proportion reporting excellent health (5.5%) was  
43  
44 lower than the UK average (21.3%).[30]  
45  
46  
47

## 48 **CONCLUSION**

49 This study identified that, in a population-based sample (including over-representation of lower  
50  
51 socioeconomic groupings), the predictors of intention to attend for sight testing to detect  
52  
53 glaucoma were Attitude, perceived control over attendance, Anticipated regret if not attended,  
54  
55 and black ethnicity. This evidence will inform the design of a behavioural intervention to  
56  
57 maximise screening uptake. The intervention components that are the likely 'best bets' for  
58  
59  
60

1 targeting these factors can be selected using a tool systematically developed for this  
2  
3 purpose.[26] This study illustrates the evidence base that is required to inform the  
4  
5 development of interventions to influence health-related behaviours.  
6  
7  
8  
9

10  
11 Funding: This study is one component of a Medical Research Council funded strategic grant,  
12  
13 G0701759: Developing the intervention and outcome components of a proposed randomised  
14  
15 controlled trial of a national screening programme for open angle glaucoma. The Health  
16  
17 Services Research Unit receives a core grant from the Chief Scientist Office of the Scottish  
18  
19 Government Health Directorates. All research was conducted independently of the funders.  
20  
21

22 Acknowledgments: We thank Marion Campbell (MC), Augusto Azuara-Blanco (AA-B) and  
23  
24 Jemaima CheHamzah from the Glaucoma screening Platform Study research group and the  
25  
26 Glaucoma screening Platform Study advisory panel including R Bativa, D Crabb, D  
27  
28 Garway-Heath, R Hitchings; S McPherson, A Tuulonen, A Viswanathan, R Wormald for their  
29  
30 guidance and contribution to development and oversight of the study and its findings. We also  
31  
32 thank Gladys McPherson for providing IT programming support.  
33  
34  
35  
36  
37

38 Competing interests: All authors have completed the Unified Competing Interest form at  
39  
40 [www.icmje.org/coi\\_disclosure.pdf](http://www.icmje.org/coi_disclosure.pdf) (available on request from the corresponding author) and  
41  
42 declare that (1) MP, JB, CR, DJ, SC and JF had support for the submitted work through a  
43  
44 Medical Research Council funded strategic grant; (2) no authors have relationships that might  
45  
46 have an interest in the submitted work in the previous 3 years; (3) their spouses, partners, or  
47  
48 children have no financial relationships that may be relevant to the submitted work; and (4) no  
49  
50 authors have non-financial interests that may be relevant to the submitted work.  
51  
52

53 Contributors: At the time of the research all authors were at the University of Aberdeen Health  
54  
55 Services Research Unit. JB, JF, CR, MC and AA-B had the original ideas for the study. JF, MP  
56  
57 JB, SC, CR developed the questionnaire. MP and SC conducted the data collection. DJ and  
58  
59  
60

1 MP performed the statistical analysis. MP drafted the paper. All authors participated in the  
2 interpretation of results, revision and approval of the final draft. All authors had full access to  
3 all of the data in the study and can take responsibility for the integrity of the data and the  
4 accuracy of the data analysis. JF is guarantor.  
5  
6  
7  
8  
9

10 The Corresponding Author has the right to grant on behalf of all authors and does grant on  
11 behalf of all authors, a worldwide licence to the Publishers and its licensees in perpetuity, in all  
12 forms, formats and media (whether known now or created in the future), to i) publish,  
13 reproduce, distribute, display and store the Contribution, ii) translate the Contribution into other  
14 languages, create adaptations, reprints, include within collections and create summaries,  
15 extracts and/or, abstracts of the Contribution, iii) create any other derivative work(s) based on  
16 the Contribution, iv) to exploit all subsidiary rights in the Contribution, v) the inclusion of  
17 electronic links from the Contribution to third party material where-ever it may be located; and,  
18 vi) licence any third party to do any or all of the above.  
19  
20  
21  
22  
23  
24  
25  
26  
27  
28  
29  
30  
31

32 Data sharing: No additional data available  
33  
34  
35  
36  
37  
38  
39  
40  
41  
42  
43  
44  
45  
46  
47  
48  
49  
50  
51  
52  
53  
54  
55  
56  
57  
58  
59  
60



**REFERENCES**

- [1] Quigley HA, Broman AT. The number of people with glaucoma worldwide in 2010 and 2020. *Br J Ophthalmol* 2006;90:262-267
- [2] Maier PC, Funk J, Schwarzer G, et al. Treatment of ocular hypertension and open angle glaucoma: Meta-analysis of randomised controlled trials. *Br Med J* 2005 16 Jul;331(7509):134-136
- [3] Burr JM, Mowatt G, Hernandez R, et al. The clinical effectiveness and cost-effectiveness of screening for open angle glaucoma: a systematic review and economic evaluation. *Health Technol Assess* 2007 ix-x, 1-190; Oct;11(41):iii-iv, ix-x, 1-190
- [4] Chen Y, Wyatt HJ, Swanson WH, et al. Rapid pupil-based assessment of glaucomatous damage. *Optometry & Vision Science* 2008 Jun;85(6):471-481
- [5] Grant WM, Burke JF. Why do some people go blind from glaucoma? *Ophthalmology* 1982;89:991-998
- [6] Chen PP. Risk and risk factors for blindness from glaucoma. *Curr Opin Ophthalmol* 2004;15(2):107-11
- [7] Safer MA, Tharps Q,J, Jackson TC, et al. Determinants of Three Stages of Delay in Seeking Care at a Medical Clinic. *Medical care* 1979;17(1):11-29
- [8] Royal National Institute for the Blind. Open Your Eyes. 2005
- [9] Goddard M, Smith P. Equity of access to health care services: Theory and evidence from the UK. *Soc Sci Med* 2001 11;53(9):1149-1162
- [10] Cross V, Shah P, Bativa R, et al. ReGAE 2: glaucoma awareness and the primary eye-care service: some perceptions among African Caribbeans in Birmingham UK. *Eye (London)* 2007;21(7):912-20

1 [11] UK National Screening Committee. UK National Screening Committee's Policy Positions.  
2  
3  
4 2009; Available at: <http://www.screening.nhs.uk/criteria>

5  
6  
7 [12] Cooke R, French DP. How well do the theory of reasoned action and theory of planned  
8  
9 behaviour predict intentions and attendance at screening programmes? A meta-analysis.  
10  
11 *Psychology and Health* 2008;23(7):745-765

12  
13  
14 [13] Ajzen I. The theory of planned behaviour. *Organisational Behaviour and Human Decision*  
15  
16 *Process* 1991;50(1):179-211

17  
18  
19 [14] Leventhal H, Nerenz DR, Steele DJ. Illness representations and coping with health  
20  
21 threats. In: Baum A, Taylor SE, Singer JE, eds. Handbook of psychology and health: social  
22  
23 psychological aspects of health. Hillsdale, NJ: Erlbaum; 1984:219-252

24  
25  
26 [15] Abraham C, Sheeran P. Acting on intentions: The role of anticipated regret. *British Journal*  
27  
28 *of Social Psychology* 2003;42(4):495-511

29  
30  
31 [16] SCS Direct. 2004; Available at:  
32  
33 [http://www.scsdirect.com:8888/webcount\\_v2\\_2/index.jsp??linkname=first](http://www.scsdirect.com:8888/webcount_v2_2/index.jsp??linkname=first)

34  
35  
36 [17] Fraser S, Bunce C, Wormald R, et al. Deprivation and late presentation of glaucoma:  
37  
38 Case-control study. *Br Med J* 2001 17 Mar;322(7287):639-643

39  
40  
41 [18] Francis JJ, Eccles MP, Johnston M, et al. Constructing questionnaires based on the  
42  
43 theory of planned behaviour: a manual for health services researchers. 2004;ISBN:0-9540161-  
44  
45 5-7

46  
47  
48 [19] Broadbent E, Petrie KJ, Main J, et al. The Brief Illness Perception Questionnaire. *Journal*  
49  
50 *of Psychosomatic Research* 2006;60:631-637

51  
52  
53 [20] Figueiras MJ, Alves NC. Lay perceptions of serious illnesses: An adapted version of the  
54  
55 Revised Illness Perceptions Questionnaire (IPQ-R) for healthy people. *Psychology and Health*  
56  
57  
58 2007;22(2):143-158  
59  
60

- 1  
2 [21] Glaucoma screening Platform Study group, Burr, JM, Campbell MK, et al. Developing the  
3 clinical components of a complex intervention for a glaucoma screening trial: a mixed methods  
4 study. *BMC Medical Research Methodology* 2011;11(54)  
5  
6  
7  
8  
9 [22] Tabachnik B, Fidell L. Using Multivariate Statistics. New York: Harper Collins; 1996  
10  
11  
12 [23] Nunnally JC, Bernstein IH. Psychometric theory 3rd ed. New York: McGraw-Hill; 1994  
13  
14  
15 [24] Armitage CJ, Conner M. Efficacy of the Theory of Planned Behaviour: A meta-analytic  
16 review. *British Journal of Social Psychology* 2001;40(4):471-499  
17  
18  
19  
20 [25] Sheeran P. Intention—Behavior Relations: A Conceptual and Empirical Review. *European*  
21 *Review of Social Psychology* 2002;12(1):1-36  
22  
23  
24  
25 [26] Michie S, Johnston M, Francis J, et al. From Theory to Intervention: Mapping Theoretically  
26 Derived Behavioural Determinants to Behaviour Change Techniques. *Appl Psychol*  
27  
28 2008;57(4):660-680  
29  
30  
31  
32 [27] Alkerwi A, Sauvageot N, Donneau A, et al. First nationwide survey on cardiovascular risk  
33 factors in Grand-Duchy of Luxembourg (ORISCAV-LUX). *BMC Public Health* 2010;10(468)  
34  
35  
36  
37 [28] Palmer RC, Emmons KM, Fletcher RH, et al. Familial risk and colorectal cancer screening  
38 health beliefs and attitudes in an insured population. *Prev Med* 2007 11;45(5):336-341  
39  
40  
41  
42 [29] Office for National Statistics. Ethnicity and Identity - Census 2001 Key Statistics. Available  
43 at: [http://www.ons.gov.uk/ons/downloads/theme\\_compensia/foe2004/ethnicity.pdf](http://www.ons.gov.uk/ons/downloads/theme_compensia/foe2004/ethnicity.pdf). Accessed  
44  
45  
46  
47 September 21, 2011  
48  
49  
50 [30] Taylor MF, Brice J, Buck N, et al. British Household Panel Survey User Manual Volume A:  
51 Introduction, Technical Report and Appendices.  
52  
53  
54  
55  
56  
57  
58  
59  
60

Table 1 Sample questionnaire items designed to assess theoretical predictors.

| Section A                                                     | Items designed to measure each component                                                                         | Response options                                                                             |
|---------------------------------------------------------------|------------------------------------------------------------------------------------------------------------------|----------------------------------------------------------------------------------------------|
| Dependent variable:<br>Intention<br>(Items: A1, A8, A17)      | <i>If I received a letter inviting me to attend for an eye health test I would attend</i>                        | Strongly disagree (1) to<br>Strongly agree (7)                                               |
| Predictors:                                                   |                                                                                                                  |                                                                                              |
| Attitude<br>(Items A21A-<br>A21F)                             | <i>For me, attending an eye health test would be...</i>                                                          | not worthwhile (1) to worthwhile (7)<br>bad use of my time (1) to good use of my<br>time (7) |
| Subjective Norm<br>(Items A6,A19,<br>A20)                     | <i>Most people who are important to me would think that I should attend an eye health test</i>                   | Strongly disagree (1) to<br>Strongly agree (7)                                               |
| Perceived Behavioural Control<br>(Items A5, A14,<br>A15, A22) | <i>Whether I attend an eye health test would be entirely up to me</i>                                            | Strongly disagree (1) to<br>Strongly agree (7)                                               |
| Anticipated Regret<br>(Items: A7, A18)                        | <i>If I was invited for an eye health test and I did not attend I would later wish I had.</i>                    | Strongly disagree (1) to<br>Strongly agree (7)                                               |
| Section B<br>(Items B2- B9)                                   |                                                                                                                  | 10-point response options                                                                    |
| Consequences                                                  | <i>How much do you think glaucoma would affect your life?</i>                                                    | No effect at all (1) to Would severely affect my life (10)                                   |
| Timeline                                                      | <i>How long do you think glaucoma lasts?</i>                                                                     | Very short time (1) to Forever (10)                                                          |
| Personal Control                                              | <i>Once a person has been diagnosed with glaucoma, how much control do you think they have over the disease?</i> | Extreme amount of control (1) to Absolutely no control (10)                                  |
| Treatment Control                                             | <i>How helpful do you think treatment is for glaucoma?</i>                                                       | Extremely helpful (1) to Not at all (10)                                                     |
| Identity                                                      | <i>How much do you think a person with glaucoma would experience symptoms</i>                                    | No symptoms at all (1) to Many severe symptoms (10)                                          |
| Concern                                                       | <i>How concerned are you about getting glaucoma?</i>                                                             | Not at all concerned (1) to Extremely concerned (10)                                         |
| Coherence                                                     | <i>How well do you feel you understand glaucoma?</i>                                                             | Understand very clearly (1) to Don't understand at all (10)                                  |
| Emotional Representation                                      | <i>How much does the possibility of getting glaucoma affect you emotionally?</i>                                 | Not at all affected emotionally (1) to Extremely emotionally affected (10)                   |

Note: full questionnaire included as a supplementary file

Table 2 Sample characteristics from both locations

| Sample characteristic                                      | n   | (%)    |
|------------------------------------------------------------|-----|--------|
| <b>Male</b>                                                | 143 | (43.7) |
| <b>General Health Status</b>                               |     |        |
| Excellent                                                  | 18  | (5.5)  |
| Very Good                                                  | 79  | (24.2) |
| Good                                                       | 134 | (41.0) |
| Fair                                                       | 71  | (21.7) |
| Poor                                                       | 18  | (5.5)  |
| <b>Heard of the term glaucoma</b>                          | 280 | (85.6) |
| <b>Last Eye Test within 3 years</b>                        | 265 | (81.0) |
| <b>Black Ethnicity</b> (Black British, Caribbean, African) | 33  | (10.1) |
| <b>Diabetic</b>                                            | 37  | (11.3) |
| <b>Short-sighted</b>                                       | 144 | (44.0) |
| <b>Family history of glaucoma</b>                          | 53  | (16.2) |

Table 3 Summary statistics for theory-based variables in the analysis including correlations with intention scores.

| Section & Factor                                             | Mean (sd) | Median (Q1, Q3)  | Pearson correlation with intention score |
|--------------------------------------------------------------|-----------|------------------|------------------------------------------|
| Section A: Attending an eye health test                      |           |                  |                                          |
| Intention                                                    | 6.3 (1.0) | 6.7 (6.0, 7.0)   |                                          |
| Attitude                                                     | 6.3 (1.0) | 6.7 (6.0, 7.0)   | 0.67**                                   |
| Subjective Norm                                              | 6.0 (1.2) | 6.3 (5.3, 7.0)   | 0.59**                                   |
| Perceived Behavioural Control                                | 6.3 (0.8) | 6.5 (6.0, 7.0)   | 0.71**                                   |
| Anticipated Regret                                           | 6.0 (1.2) | 6.5 (5.5, 7.0)   | 0.76**                                   |
| Section B: Illness and emotional representations of glaucoma |           |                  |                                          |
| Consequences                                                 | 8.6 (1.9) | 9.5 (8.0, 10.0)  | 0.44**                                   |
| Timeline                                                     | 8.6 (2.0) | 10.0 (8.0, 10.0) | 0.24**                                   |
| Personal control                                             | 6.2 (2.7) | 6.0 (4.0, 8.0)   | -0.43                                    |
| Treatment control                                            | 3.2 (2.4) | 3.0 (1.0, 5.0)   | 0.28**                                   |
| Identity                                                     | 6.8 (2.4) | 7.0 (5.0, 8.5)   | 0.17**                                   |
| Illness concern                                              | 7.3 (2.8) | 8.0 (5.0, 10.0)  | 0.35**                                   |
| Coherence                                                    | 6.6 (2.7) | 7.0 (5.0, 9.0)   | 0.16**                                   |
| Emotional representation                                     | 6.0 (2.8) | 6.0 (4.0, 8.0)   | 0.25**                                   |

Note: Scales ranged from: (1) negative intention/belief to (7) positive intention/belief (Section A); (1) positive representation of glaucoma to (10) negative representation of glaucoma (Section B).

\*\*p<0.01

Table 4 Independent sample t-tests on intention scores.

|                               |                             | N <sup>#</sup> | Mean Intention<br>Score | SD   | t    | p       |
|-------------------------------|-----------------------------|----------------|-------------------------|------|------|---------|
| Heard of<br>glaucoma          | Yes                         | 280            | 6.33                    | 0.91 | 2.04 | 0.047** |
|                               | No                          | 44             | 5.87                    | 1.43 |      |         |
| Gender                        | Male                        | 143            | 6.28                    | 0.88 | 0.17 | 0.868   |
|                               | Female                      | 177            | 6.30                    | 1.05 |      |         |
| Ethnicity                     | All Black ethnicities       | 33             | 5.80                    | 1.51 | 2.05 | 0.048** |
|                               | All other ethnicities       | 281            | 6.35                    | 0.87 |      |         |
| Diabetes                      | Yes                         | 37             | 6.41                    | 0.98 | 0.71 | 0.476   |
|                               | No                          | 278            | 6.29                    | 0.96 |      |         |
| Last eye test                 | Within the last 3 years     | 265            | 6.29                    | 1.00 | 0.17 | 0.867   |
|                               | More than 3 years ago/never | 56             | 6.31                    | 0.86 |      |         |
| Short-sighted                 | Yes                         | 144            | 6.30                    | 0.91 | 0.84 | 0.402†  |
|                               | No                          | 107            | 6.19                    | 1.14 |      |         |
|                               | Don't know                  | 61             | 6.44                    | 0.82 |      |         |
| Family history of<br>Glaucoma | Yes                         | 53             | 6.43                    | 0.69 | 1.11 | 0.269†  |
|                               | No                          | 172            | 6.27                    | 1.00 |      |         |
|                               | Don't know                  | 94             | 6.30                    | 0.99 |      |         |

# Numbers for each variable do not add up to 327 as some participants did not provide the information

† The test was between "yes" and "no" with those answering "don't know" left out. When the t-tests were repeated with the variables coded dichotomously (yes versus 'not yes') the t-tests remained non-significant.

1  
2  
3  
4  
5  
6  
7  
8  
9  
10  
11  
12  
13  
14  
15  
16  
17  
18  
19  
20  
21  
22  
23  
24  
25  
26  
27  
28  
29  
30  
31  
32  
33  
34  
35  
36  
37  
38  
39  
40  
41  
42  
43  
44  
45  
46  
47  
48  
49  
50  
51  
52  
53  
54  
55  
56  
57  
58  
59  
60

Table 5 Hierarchical regression model summary for predicting intention to attend and eye test.

| Model | R <sup>2</sup> | R <sup>2</sup> Change | p-value |
|-------|----------------|-----------------------|---------|
| 1     | 0.651          | 0.651                 | <0.001  |
| 2     | 0.738          | 0.088                 | <0.001  |
| 3     | 0.747          | 0.009                 | 0.006   |
| 4     | 0.752          | 0.004                 | 0.025   |

For peer review only



Table 6 Coefficients of terms in the final model (Model 4) for predicting intention to attend and eye test.

| Variable                        | Coefficient   | Standard Error | 95% CI          | p-value      |
|---------------------------------|---------------|----------------|-----------------|--------------|
| (Constant)                      | -0.067        | 0.248          | (-0.556,0.421)  | 0.786        |
| <b>Attitude</b>                 | <b>0.176</b>  | 0.039          | (0.098,0.253)   | <b>0.000</b> |
| <b>Subjective norm</b>          | <b>0.067</b>  | 0.030          | (0.007,0.126)   | <b>0.028</b> |
| <b>PBC</b>                      | <b>0.407</b>  | 0.046          | (0.316,0.499)   | <b>0.000</b> |
| <b>Anticipated regret</b>       | <b>0.298</b>  | 0.033          | (0.232,0.363)   | <b>0.000</b> |
| <b>Consequences of glaucoma</b> | <b>0.045</b>  | 0.016          | (0.013,0.078)   | <b>0.006</b> |
| Illness concern                 | 0.016         | 0.011          | (-0.006,0.037)  | 0.153        |
| <b>Black ethnicity</b>          | <b>-0.212</b> | 0.094          | (-0.396,-0.027) | <b>0.025</b> |

Figure 1 Frequency distribution of mean intention scores (possible range 1 – 7).

1  
2  
3  
4  
5  
6  
7  
8  
9  
10  
11  
12  
13  
14  
15  
16  
17  
18  
19  
20  
21  
22  
23  
24  
25  
26  
27  
28  
29  
30  
31  
32  
33  
34  
35  
36  
37  
38  
39  
40  
41  
42  
43  
44  
45  
46  
47  
48  
49  
50  
51  
52  
53  
54  
55  
56  
57  
58  
59  
60

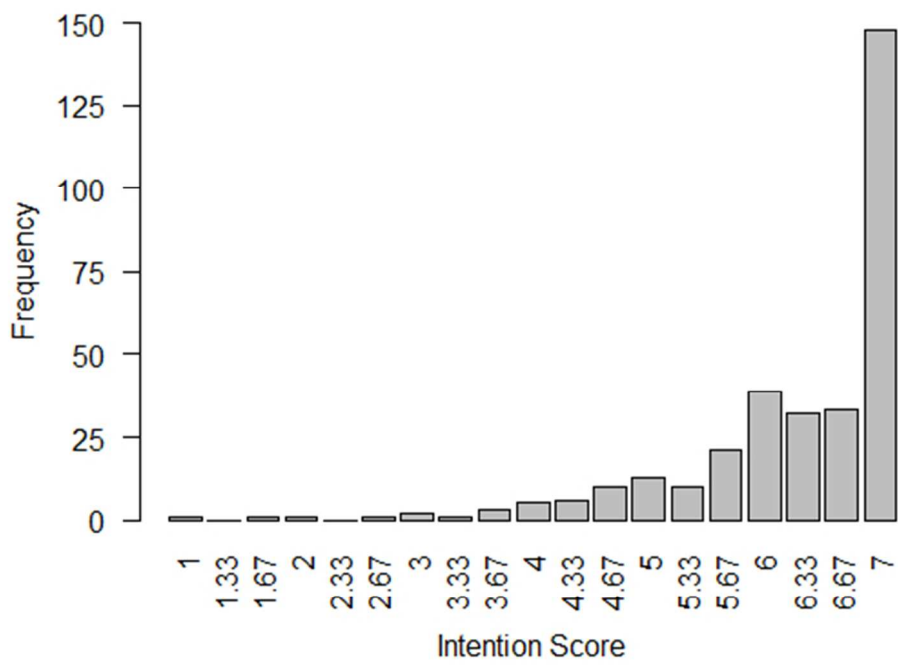

Figure 1 Frequency distribution of mean intention scores  
194x158mm (72 x 72 DPI)

Study No

|   |  |  |  |  |  |
|---|--|--|--|--|--|
| 1 |  |  |  |  |  |
| 2 |  |  |  |  |  |

3  
4  
5  
6  
7  
8  
9  
10  
11  
12  
13  
14  
15  
16  
17  
18  
19  
20  
21  
22  
23  
24  
25  
26  
27  
28  
29  
30  
31  
32  
33  
34  
35  
36  
37  
38  
39  
40  
41  
42  
43  
44  
45  
46  
47  
48  
49  
50  
51  
52  
53  
54  
55  
56  
57  
58  
59  
60

# New Eye Health Tests

## Questionnaire

**Thank you for taking the time to help us with this study**

**Confidential**

The aim of this study is to find out your views on possible new NHS eye health tests.

1  
2 These tests would be a separate service to the routine eyesight tests currently offered at High Street  
3 Opticians.

4  
5  
6 Your answers to this questionnaire will help us to identify how best to offer new NHS eye health tests.

7  
8  
9 Unfortunately, we are not able to invite you to attend an eye health test as part of this study.  
10  
11 We are just asking for your views.  
12  
13  
14

15  
16  
17 **HOW TO FILL IN THIS QUESTIONNAIRE**

18  
19 We are interested in **your own personal views**, not what you think we want to hear.  
20  
21 There are no right or wrong answers.

22  
23 Most questions can be answered by **ticking** the appropriate box (ONE box only)

24  
25 For example

26  
27  
28 Strongly disagree      1      2      3      4      5      6      7      Strongly agree  
29                                             
30  
31  
32

33  
34 If you make a mistake, shade out the wrong box and tick the correct one like this

35  
36 Strongly disagree      1      2      3      4      5      6      7      Strongly agree  
37                                             
38  
39  
40

41  
42  
43 All the answers you give are useful to us.

44  
45 Please try to complete the whole questionnaire.  
46  
47  
48  
49  
50  
51  
52  
53  
54  
55  
56  
57  
58  
59  
60



**Section A – YOUR views on eye health tests**

Please tell us what **YOU** think about eye health tests.

*For each question choose a number between 1 and 7 that best reflects your views (Tick ONE box only)*

1  
2  
3  
4  
5  
6  
7  
8  
9  
10  
11  
12  
13  
14  
15  
16  
17  
18  
19  
20  
21  
22  
23  
24  
25  
26  
27  
28  
29  
30  
31  
32  
33  
34  
35  
36  
37  
38  
39  
40  
41  
42  
43  
44  
45  
46  
47  
48  
49  
50  
51  
52  
53  
54  
55  
56  
57  
58  
59  
60

**A1. If I received a letter inviting me for an eye health test I would attend**

|                          |                          |                          |                          |                          |                          |                          |                          |                       |
|--------------------------|--------------------------|--------------------------|--------------------------|--------------------------|--------------------------|--------------------------|--------------------------|-----------------------|
| <b>Strongly disagree</b> | 1                        | 2                        | 3                        | 4                        | 5                        | 6                        | 7                        | <b>Strongly agree</b> |
|                          | <input type="checkbox"/> |                       |

**A2. If I attend an eye health test it would tell me whether or not I had a problem with my eyes**

|                          |                          |                          |                          |                          |                          |                          |                          |                       |
|--------------------------|--------------------------|--------------------------|--------------------------|--------------------------|--------------------------|--------------------------|--------------------------|-----------------------|
| <b>Strongly disagree</b> | 1                        | 2                        | 3                        | 4                        | 5                        | 6                        | 7                        | <b>Strongly agree</b> |
|                          | <input type="checkbox"/> |                       |

**A3. If I attended an eye health test and it detected a problem with my eyes I would be anxious**

|                          |                          |                          |                          |                          |                          |                          |                          |                       |
|--------------------------|--------------------------|--------------------------|--------------------------|--------------------------|--------------------------|--------------------------|--------------------------|-----------------------|
| <b>Strongly disagree</b> | 1                        | 2                        | 3                        | 4                        | 5                        | 6                        | 7                        | <b>Strongly agree</b> |
|                          | <input type="checkbox"/> |                       |

**A4. If I attend an eye health test, any problems would be picked up early**

|                          |                          |                          |                          |                          |                          |                          |                          |                       |
|--------------------------|--------------------------|--------------------------|--------------------------|--------------------------|--------------------------|--------------------------|--------------------------|-----------------------|
| <b>Strongly disagree</b> | 1                        | 2                        | 3                        | 4                        | 5                        | 6                        | 7                        | <b>Strongly agree</b> |
|                          | <input type="checkbox"/> |                       |

**A5. Whether I attend an eye health test would be entirely up to me**

|                          |                          |                          |                          |                          |                          |                          |                          |                       |
|--------------------------|--------------------------|--------------------------|--------------------------|--------------------------|--------------------------|--------------------------|--------------------------|-----------------------|
| <b>Strongly disagree</b> | 1                        | 2                        | 3                        | 4                        | 5                        | 6                        | 7                        | <b>Strongly agree</b> |
|                          | <input type="checkbox"/> |                       |

**A6. Most people who are important to me would think that I should attend an eye health test**

|                          |                          |                          |                          |                          |                          |                          |                          |                       |
|--------------------------|--------------------------|--------------------------|--------------------------|--------------------------|--------------------------|--------------------------|--------------------------|-----------------------|
| <b>Strongly disagree</b> | 1                        | 2                        | 3                        | 4                        | 5                        | 6                        | 7                        | <b>Strongly agree</b> |
|                          | <input type="checkbox"/> |                       |



A7. If I was invited for an eye health test and I did *not* attend I would feel sorry

|                   |                          |                          |                          |                          |                          |                          |                          |                |
|-------------------|--------------------------|--------------------------|--------------------------|--------------------------|--------------------------|--------------------------|--------------------------|----------------|
| Strongly disagree | 1                        | 2                        | 3                        | 4                        | 5                        | 6                        | 7                        | Strongly agree |
|                   | <input type="checkbox"/> |                |

A8. I would make it a high priority to attend an eye health test

|                   |                          |                          |                          |                          |                          |                          |                          |                |
|-------------------|--------------------------|--------------------------|--------------------------|--------------------------|--------------------------|--------------------------|--------------------------|----------------|
| Strongly disagree | 1                        | 2                        | 3                        | 4                        | 5                        | 6                        | 7                        | Strongly agree |
|                   | <input type="checkbox"/> |                |

A9. If I attend an eye health test it would find problems before I notice anything is wrong

|                   |                          |                          |                          |                          |                          |                          |                          |                |
|-------------------|--------------------------|--------------------------|--------------------------|--------------------------|--------------------------|--------------------------|--------------------------|----------------|
| Strongly disagree | 1                        | 2                        | 3                        | 4                        | 5                        | 6                        | 7                        | Strongly agree |
|                   | <input type="checkbox"/> |                |

A10. If I attended an eye health test and it detected a problem with my eyes, the problem could be treated

|                   |                          |                          |                          |                          |                          |                          |                          |                |
|-------------------|--------------------------|--------------------------|--------------------------|--------------------------|--------------------------|--------------------------|--------------------------|----------------|
| Strongly disagree | 1                        | 2                        | 3                        | 4                        | 5                        | 6                        | 7                        | Strongly agree |
|                   | <input type="checkbox"/> |                |

A11. If I attended an eye health test and it detected *no* problems it would give me peace of mind

|                   |                          |                          |                          |                          |                          |                          |                          |                |
|-------------------|--------------------------|--------------------------|--------------------------|--------------------------|--------------------------|--------------------------|--------------------------|----------------|
| Strongly disagree | 1                        | 2                        | 3                        | 4                        | 5                        | 6                        | 7                        | Strongly agree |
|                   | <input type="checkbox"/> |                |

A12. If I attended an eye health test it would pick up additional eye problems to a routine/normal eye sight test

|                   |                          |                          |                          |                          |                          |                          |                          |                |
|-------------------|--------------------------|--------------------------|--------------------------|--------------------------|--------------------------|--------------------------|--------------------------|----------------|
| Strongly disagree | 1                        | 2                        | 3                        | 4                        | 5                        | 6                        | 7                        | Strongly agree |
|                   | <input type="checkbox"/> |                |

A13. If I attend an eye health test it may show up other health problems (e.g. diabetes, high blood pressure)

|                   |                          |                          |                          |                          |                          |                          |                          |                |
|-------------------|--------------------------|--------------------------|--------------------------|--------------------------|--------------------------|--------------------------|--------------------------|----------------|
| Strongly disagree | 1                        | 2                        | 3                        | 4                        | 5                        | 6                        | 7                        | Strongly agree |
|                   | <input type="checkbox"/> |                |



1  
2  
3  
4  
5  
6  
7

**A14. I am confident that I *could* attend an eye health test if it was available**

|                   |                          |                          |                          |                          |                          |                          |                          |                |
|-------------------|--------------------------|--------------------------|--------------------------|--------------------------|--------------------------|--------------------------|--------------------------|----------------|
| Strongly disagree | 1                        | 2                        | 3                        | 4                        | 5                        | 6                        | 7                        | Strongly agree |
|                   | <input type="checkbox"/> |                |

8  
9  
10  
11  
12  
13  
14  
15  
16

**A15. The decision to attend an eye health test would be within my control**

|                   |                          |                          |                          |                          |                          |                          |                          |                |
|-------------------|--------------------------|--------------------------|--------------------------|--------------------------|--------------------------|--------------------------|--------------------------|----------------|
| Strongly disagree | 1                        | 2                        | 3                        | 4                        | 5                        | 6                        | 7                        | Strongly agree |
|                   | <input type="checkbox"/> |                |

17  
18  
19  
20  
21  
22  
23  
24  
25  
26

**A16. If I attended an eye health test and it detected a problem with my eyes it could stop me losing my sight**

|                   |                          |                          |                          |                          |                          |                          |                          |                |
|-------------------|--------------------------|--------------------------|--------------------------|--------------------------|--------------------------|--------------------------|--------------------------|----------------|
| Strongly disagree | 1                        | 2                        | 3                        | 4                        | 5                        | 6                        | 7                        | Strongly agree |
|                   | <input type="checkbox"/> |                |

27  
28  
29  
30  
31  
32  
33  
34  
35  
36

**A17. I would rearrange other things in order to attend an eye health test**

|                   |                          |                          |                          |                          |                          |                          |                          |                |
|-------------------|--------------------------|--------------------------|--------------------------|--------------------------|--------------------------|--------------------------|--------------------------|----------------|
| Strongly disagree | 1                        | 2                        | 3                        | 4                        | 5                        | 6                        | 7                        | Strongly agree |
|                   | <input type="checkbox"/> |                |

37  
38  
39  
40  
41  
42  
43  
44  
45

**A18. If I was invited for an eye health test and I did not attend I would later wish I had**

|                   |                          |                          |                          |                          |                          |                          |                          |                |
|-------------------|--------------------------|--------------------------|--------------------------|--------------------------|--------------------------|--------------------------|--------------------------|----------------|
| Strongly disagree | 1                        | 2                        | 3                        | 4                        | 5                        | 6                        | 7                        | Strongly agree |
|                   | <input type="checkbox"/> |                |

46  
47  
48  
49  
50  
51  
52

**A19. My close relatives would want me to attend an eye health test**

|                   |                          |                          |                          |                          |                          |                          |                          |                |
|-------------------|--------------------------|--------------------------|--------------------------|--------------------------|--------------------------|--------------------------|--------------------------|----------------|
| Strongly disagree | 1                        | 2                        | 3                        | 4                        | 5                        | 6                        | 7                        | Strongly agree |
|                   | <input type="checkbox"/> |                |

53  
54  
55  
56  
57  
58  
59  
60

**A20. My friends would want me to attend an eye health test**

|                   |                          |                          |                          |                          |                          |                          |                          |                |
|-------------------|--------------------------|--------------------------|--------------------------|--------------------------|--------------------------|--------------------------|--------------------------|----------------|
| Strongly disagree | 1                        | 2                        | 3                        | 4                        | 5                        | 6                        | 7                        | Strongly agree |
|                   | <input type="checkbox"/> |                |



For each of the following options choose a number between 1 and 7 that best reflects YOUR views (Tick ONE box only)

**A21. For me, attending an eye health test would be...**

|                          |                          |                          |                          |                          |                          |                          |                          |                        |
|--------------------------|--------------------------|--------------------------|--------------------------|--------------------------|--------------------------|--------------------------|--------------------------|------------------------|
| 7 Not worthwhile         | 1                        | 2                        | 3                        | 4                        | 5                        | 6                        | 7                        | Worthwhile             |
|                          | <input type="checkbox"/> |                        |
| 12 Bad use of my time    | 1                        | 2                        | 3                        | 4                        | 5                        | 6                        | 7                        | Good use of my time    |
|                          | <input type="checkbox"/> |                        |
| 17 Unimportant           | 1                        | 2                        | 3                        | 4                        | 5                        | 6                        | 7                        | Important              |
|                          | <input type="checkbox"/> |                        |
| 22 Unpleasant            | 1                        | 2                        | 3                        | 4                        | 5                        | 6                        | 7                        | Pleasant               |
|                          | <input type="checkbox"/> |                        |
| 27 Uninformative         | 1                        | 2                        | 3                        | 4                        | 5                        | 6                        | 7                        | Informative            |
|                          | <input type="checkbox"/> |                        |
| 32 Bad for my eye health | 1                        | 2                        | 3                        | 4                        | 5                        | 6                        | 7                        | Good for my eye health |
|                          | <input type="checkbox"/> |                        |

**A22. Attending an eye health test would be...**

|                     |                          |                          |                          |                          |                          |                          |                          |             |
|---------------------|--------------------------|--------------------------|--------------------------|--------------------------|--------------------------|--------------------------|--------------------------|-------------|
| 41 Difficult for me | 1                        | 2                        | 3                        | 4                        | 5                        | 6                        | 7                        | Easy for me |
|                     | <input type="checkbox"/> |             |

**A23. If I was sent an eye health appointment for a specific day and time it would be...**

|                               |                          |                          |                          |                          |                          |                          |                          |                       |
|-------------------------------|--------------------------|--------------------------|--------------------------|--------------------------|--------------------------|--------------------------|--------------------------|-----------------------|
| 49 Difficult for me to attend | 1                        | 2                        | 3                        | 4                        | 5                        | 6                        | 7                        | Easy for me to attend |
|                               | <input type="checkbox"/> |                       |

**A24. If an eye health test was available locally (e.g. within 10 miles) it would be...**

|                               |                          |                          |                          |                          |                          |                          |                          |                       |
|-------------------------------|--------------------------|--------------------------|--------------------------|--------------------------|--------------------------|--------------------------|--------------------------|-----------------------|
| 58 Difficult for me to attend | 1                        | 2                        | 3                        | 4                        | 5                        | 6                        | 7                        | Easy for me to attend |
|                               | <input type="checkbox"/> |                       |



**A25. If an eye health test was only available during working hours it would be...**

1  
2  
3  
4  
5  
6  
7

|                               |                          |                          |                          |                          |                          |                          |                          |                          |
|-------------------------------|--------------------------|--------------------------|--------------------------|--------------------------|--------------------------|--------------------------|--------------------------|--------------------------|
| Difficult for me<br>to attend | 1                        | 2                        | 3                        | 4                        | 5                        | 6                        | 7                        | Easy for me<br>to attend |
|                               | <input type="checkbox"/> |                          |

**A26. If an eye health test was available during evenings and weekends it would be...**

8  
9  
10  
11  
12  
13  
14  
15  
16

|                               |                          |                          |                          |                          |                          |                          |                          |                          |
|-------------------------------|--------------------------|--------------------------|--------------------------|--------------------------|--------------------------|--------------------------|--------------------------|--------------------------|
| Difficult for me<br>to attend | 1                        | 2                        | 3                        | 4                        | 5                        | 6                        | 7                        | Easy for me<br>to attend |
|                               | <input type="checkbox"/> |                          |

**A27. If the location for the eye health test was a Community Health Centre (GP surgery) it would be ...**

17  
18  
19  
20  
21  
22  
23  
24  
25  
26

|                               |                          |                          |                          |                          |                          |                          |                          |                          |
|-------------------------------|--------------------------|--------------------------|--------------------------|--------------------------|--------------------------|--------------------------|--------------------------|--------------------------|
| Difficult for me<br>to attend | 1                        | 2                        | 3                        | 4                        | 5                        | 6                        | 7                        | Easy for me<br>to attend |
|                               | <input type="checkbox"/> |                          |

**A28. If the location for the eye health test was a High Street Optician it would be...**

27  
28  
29  
30  
31  
32  
33  
34

|                               |                          |                          |                          |                          |                          |                          |                          |                          |
|-------------------------------|--------------------------|--------------------------|--------------------------|--------------------------|--------------------------|--------------------------|--------------------------|--------------------------|
| Difficult for me<br>to attend | 1                        | 2                        | 3                        | 4                        | 5                        | 6                        | 7                        | Easy for me<br>to attend |
|                               | <input type="checkbox"/> |                          |

**A29. Showing up other health problems (e.g. diabetes, high blood pressure) in the eye health test is...**

35  
36  
37  
38  
39  
40  
41  
42  
43  
44

|             |                          |                          |                          |                          |                          |                          |                          |           |
|-------------|--------------------------|--------------------------|--------------------------|--------------------------|--------------------------|--------------------------|--------------------------|-----------|
| Unimportant | 1                        | 2                        | 3                        | 4                        | 5                        | 6                        | 7                        | Important |
|             | <input type="checkbox"/> |           |

**A30. My close relatives' views about me attending an eye health test are important to me**

45  
46  
47  
48  
49  
50  
51  
52  
53

|            |                          |                          |                          |                          |                          |                          |                          |              |
|------------|--------------------------|--------------------------|--------------------------|--------------------------|--------------------------|--------------------------|--------------------------|--------------|
| Not at all | 1                        | 2                        | 3                        | 4                        | 5                        | 6                        | 7                        | Very much so |
|            | <input type="checkbox"/> |              |

**A31. My friends' views about me attending an eye health test are important to me**

54  
55  
56  
57  
58  
59  
60

|            |                          |                          |                          |                          |                          |                          |                          |              |
|------------|--------------------------|--------------------------|--------------------------|--------------------------|--------------------------|--------------------------|--------------------------|--------------|
| Not at all | 1                        | 2                        | 3                        | 4                        | 5                        | 6                        | 7                        | Very much so |
|            | <input type="checkbox"/> |              |



## Section B - Your views on the eye condition glaucoma

B1. Have you heard of the eye condition glaucoma?

Yes

No

For the following questions choose a number between 0 and 10 that best reflects your views (Tick ONE box only)

B2. How much do you think glaucoma would affect your life?

No effect  
at all

|                          |                          |                          |                          |                          |                          |                          |                          |                          |                          |
|--------------------------|--------------------------|--------------------------|--------------------------|--------------------------|--------------------------|--------------------------|--------------------------|--------------------------|--------------------------|
| 1                        | 2                        | 3                        | 4                        | 5                        | 6                        | 7                        | 8                        | 9                        | 10                       |
| <input type="checkbox"/> |

Would  
severely  
affect my life

B3. How long do you think glaucoma lasts?

Very short  
time

|                          |                          |                          |                          |                          |                          |                          |                          |                          |                          |
|--------------------------|--------------------------|--------------------------|--------------------------|--------------------------|--------------------------|--------------------------|--------------------------|--------------------------|--------------------------|
| 1                        | 2                        | 3                        | 4                        | 5                        | 6                        | 7                        | 8                        | 9                        | 10                       |
| <input type="checkbox"/> |

Forever

B4. Once a person has been diagnosed with glaucoma, how much control do you think they have over the disease?

Absolutely  
no control

|                          |                          |                          |                          |                          |                          |                          |                          |                          |                          |
|--------------------------|--------------------------|--------------------------|--------------------------|--------------------------|--------------------------|--------------------------|--------------------------|--------------------------|--------------------------|
| 1                        | 2                        | 3                        | 4                        | 5                        | 6                        | 7                        | 8                        | 9                        | 10                       |
| <input type="checkbox"/> |

Extreme  
amount of  
control

B5. How helpful do you think treatment is for glaucoma?

Not at all

|                          |                          |                          |                          |                          |                          |                          |                          |                          |                          |
|--------------------------|--------------------------|--------------------------|--------------------------|--------------------------|--------------------------|--------------------------|--------------------------|--------------------------|--------------------------|
| 1                        | 2                        | 3                        | 4                        | 5                        | 6                        | 7                        | 8                        | 9                        | 10                       |
| <input type="checkbox"/> |

Extremely  
helpful

B6. How much do you think a person with glaucoma would experience symptoms?

No symptoms  
at all

|                          |                          |                          |                          |                          |                          |                          |                          |                          |                          |
|--------------------------|--------------------------|--------------------------|--------------------------|--------------------------|--------------------------|--------------------------|--------------------------|--------------------------|--------------------------|
| 1                        | 2                        | 3                        | 4                        | 5                        | 6                        | 7                        | 8                        | 9                        | 10                       |
| <input type="checkbox"/> |

Many severe  
symptoms



1  
2 **B7. How concerned are you about getting glaucoma?**  
3  
4 Not at all concerned      1      2      3      4      5      6      7      8      9      10      Extremely concerned  
5                                                              
6  
7

8  
9 **B8. How well do you feel you understand glaucoma?**  
10  
11 Don't understand at all      1      2      3      4      5      6      7      8      9      10      Understand very clearly  
12                                                              
13  
14

15  
16  
17 **B9. How much does the possibility of getting glaucoma affect you emotionally?**  
18  
19 Not at all affected emotionally      1      2      3      4      5      6      7      8      9      10      Extremely affected emotionally  
20                                                              
21  
22  
23  
24

25  
26 **B10. Please list in order of importance the 3 most important factors that you believe cause glaucoma**  
27  
28  
29 1.   
30  
31 2.   
32  
33 3.   
34  
35  
36  
37  
38  
39  
40  
41  
42  
43  
44  
45  
46  
47  
48  
49  
50  
51  
52  
53  
54  
55  
56  
57  
58  
59  
60



## Section C - Can you tell us a little bit about yourself?

1  
2  
3  
4  
5  
6  
7  
8  
9  
10  
11  
12  
13  
14  
15  
16  
17  
18  
19  
20  
21  
22  
23  
24  
25  
26  
27  
28  
29  
30  
31  
32  
33  
34  
35  
36  
37  
38  
39  
40  
41  
42  
43  
44  
45  
46  
47  
48  
49  
50  
51  
52  
53  
54  
55  
56  
57  
58  
59  
60

C1. Are you...

Male Female 

C2. What is your age?

 years

C3. In general, would you say your health is... (please tick one box only)

Excellent

Very Good

Good

Fair

Poor

C4. Ethnic group

Please tick the box that best describes your ethnic group (please tick ONE box only)

White British Mixed – White and Black Caribbean Any other White background Mixed – White and Black African Black or Black British – Black Caribbean Mixed – White and Asian Black or Black British – Black African Any other mixed background Black or Black British  
(Any other Black background) Any other Asian or Asian British Prefer not to answer Chinese 

C5. Do you have diabetes (Type 1 or 2)?

Yes No



**C6. When did you last have your eyes tested?**

Within the last 3 years

More than 10 years ago

Between 3 and 5 years ago

Never

Between 5 and 10 years ago

**C7. Are you short-sighted?**

Yes

No

Don't know

**C8. Is there a history of glaucoma in your family?**

Yes

No

Don't know

**Section D – Would you attend this eye health appointment?**

*Please choose a number between 1 and 7 (Tick ONE box only)*

**D1. Please imagine that you receive a letter inviting you to attend an eye health test. The letter contains the following information:**

- a fixed appointment time that you can change if it is not convenient
- the test will be done at your Community Health Centre (GP surgery)
- the test takes about 15 minutes
- appointments are available outside of working hours

**How certain are you that you would attend this eye health appointment?**

I am certain I would *not* attend

1

2

3

4

5

6

7

I am certain I would attend

I am not sure

**End of questionnaire**



1  
2  
3  
4  
5  
6  
7  
8  
9  
10  
11  
12  
13  
14  
15  
16  
17  
18  
19  
20  
21  
22  
23  
24  
25  
26  
27  
28  
29  
30  
31  
32  
33  
34  
35  
36  
37  
38  
39  
40  
41  
42  
43  
44  
45  
46  
47  
48  
49  
50  
51  
52  
53  
54  
55  
56  
57  
58  
59  
60

**Thank you very much for your time and patience in filling in this questionnaire**

The information you have given us will be extremely useful to us

It will be treated with the strictest confidence and kept securely

Please send the questionnaire back to us in Aberdeen in the pre-paid envelope provided

If you would like further information or have any questions about the study, please contact:

The Eye Health Screening Study Co-ordinator – Dr. Maria Prior (Tel: 01224 559800)

This study is taking place across the UK but questionnaires are being processed in Aberdeen at the Health Services Research Unit, University of Aberdeen, Health Sciences Building, Foresterhill, ABERDEEN, AB25 2ZD

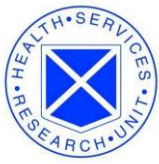

University of Aberdeen  
3<sup>rd</sup> Floor, Health Sciences Building  
Foresterhill  
Aberdeen AB25 2ZD  
Scotland  
United Kingdom

Tel: +44 (0) 1224 59800  
Fax: +44 (0) 1224 554580  
Email: m.e.prior@abdn.ac.uk

## New Eye Health Tests: your views A Questionnaire Study

Dear <<title name>>

We are writing to ask if you will answer some questions as part of an important new study into eye health. Please note, **we are not asking you to have an eye test, only to fill in a questionnaire**. The study is funded by the Medical Research Council and is part of internationally recognised research looking at whether introducing new NHS eye health tests would be worthwhile.

### Why are we doing this study?

Certain eye conditions do not cause obvious symptoms in the early stages. By the time people notice anything is wrong, there may be permanent damage to their vision. We want to find out whether introducing new NHS eye health tests would reduce the number of people who go on to have serious vision problems. These tests would be a separate service to the routine eyesight tests currently offered at High Street Opticians in the UK.

### Why have you been chosen?

We want people like you - who might be invited to have a test if it was available – to give us your personal views about a proposed new NHS eye health test programme. Your answers to the questionnaire will help us to decide how best to design this kind of programme.

This letter is being sent to about 500 people, chosen from the electoral register, in your area.

**Whether you think you have an eye problem or not, we would like you to complete the questionnaire.**

### What do you have to do to take part?

All you will need to do is to complete the enclosed questionnaire and return it in the reply-paid envelope provided. The questionnaire should take about 10 minutes to complete.

**Do you have to take part?**

Taking part is entirely voluntary. If you decide not to take part, please return your blank questionnaire in the reply-paid envelope. However, if we have not heard from you at all after two weeks we will write to you again. If we do not hear from you after the second letter, we will not contact you again.

**Who will know what I say?**

The information you provide will be strictly confidential. Your name will not appear on your questionnaire or anywhere else. The answers you give us will be transferred to a secure computer database that is only accessible to researchers involved in this study. All information will be kept securely within the Health Services Research Unit at the University of Aberdeen for ten years, in line with current Research Governance requirements. It will then be destroyed.

**Is an NHS eye health test available now?**

No. Unfortunately, we are not able to invite you to attend an eye health test as part of this study.

**What are the possible benefits of taking part?**

Taking part in this study will be of no direct benefit to you. However, it may benefit others in the future. We have interviewed several people as part of this study and they have told us they are pleased to be asked their views about new NHS programmes before they are introduced, as this gives them the chance to influence how the health service is run.

If you would like any further information on this study, or have any questions about the study, or about the questionnaire, please do not hesitate to contact Maria Prior at the address above.

Yours sincerely

**Dr Maria Prior**

Study Co-ordinator  
on behalf of the Eye Health Screening Study Team

This study has been approved by the Ethics Review Board of the College of Life Sciences and Medicine of the University of Aberdeen.



STROBE Statement—Checklist of items that should be included in reports of *cross-sectional studies*

|                              | Item No  | Recommendation                                                                                                                                                                                                                                                                                                                                                                                                |
|------------------------------|----------|---------------------------------------------------------------------------------------------------------------------------------------------------------------------------------------------------------------------------------------------------------------------------------------------------------------------------------------------------------------------------------------------------------------|
| <b>Title and abstract</b>    | 1✓<br>✓  | (a) Indicate the study's design with a commonly used term in the title or the abstract<br>(b) Provide in the abstract an informative and balanced summary of what was done and what was found                                                                                                                                                                                                                 |
| <b>Introduction</b>          |          |                                                                                                                                                                                                                                                                                                                                                                                                               |
| Background/rationale         | 2✓       | Explain the scientific background and rationale for the investigation being reported                                                                                                                                                                                                                                                                                                                          |
| Objectives                   | 3✓       | State specific objectives, including any prespecified hypotheses                                                                                                                                                                                                                                                                                                                                              |
| <b>Methods</b>               |          |                                                                                                                                                                                                                                                                                                                                                                                                               |
| Study design                 | 4✓       | Present key elements of study design early in the paper                                                                                                                                                                                                                                                                                                                                                       |
| Setting                      | 5✓       | Describe the setting, locations, and relevant dates, including periods of recruitment, exposure, follow-up, and data collection                                                                                                                                                                                                                                                                               |
| Participants                 | 6✓       | (a) Give the eligibility criteria, and the sources and methods of selection of participants                                                                                                                                                                                                                                                                                                                   |
| Variables                    | 7✓       | Clearly define all outcomes, exposures, predictors, potential confounders, and effect modifiers. Give diagnostic criteria, if applicable                                                                                                                                                                                                                                                                      |
| Data sources/<br>measurement | 8*✓      | For each variable of interest, give sources of data and details of methods of assessment (measurement). Describe comparability of assessment methods if there is more than one group                                                                                                                                                                                                                          |
| Bias                         | 9✓       | Describe any efforts to address potential sources of bias                                                                                                                                                                                                                                                                                                                                                     |
| Study size                   | 10✓      | Explain how the study size was arrived at                                                                                                                                                                                                                                                                                                                                                                     |
| Quantitative variables       | 11✓      | Explain how quantitative variables were handled in the analyses. If applicable, describe which groupings were chosen and why                                                                                                                                                                                                                                                                                  |
| Statistical methods          | 12✓<br>✓ | (a) Describe all statistical methods, including those used to control for confounding<br>(b) Describe any methods used to examine subgroups and interactions<br>(c) Explain how missing data were addressed<br>(d) If applicable, describe analytical methods taking account of sampling strategy<br>(e) Describe any sensitivity analyses                                                                    |
| <b>Results</b>               |          |                                                                                                                                                                                                                                                                                                                                                                                                               |
| Participants                 | 13*✓     | (a) Report numbers of individuals at each stage of study—eg numbers potentially eligible, examined for eligibility, confirmed eligible, included in the study, completing follow-up, and analysed<br>(b) Give reasons for non-participation at each stage<br>(c) Consider use of a flow diagram                                                                                                               |
| Descriptive data             | 14*✓     | (a) Give characteristics of study participants (eg demographic, clinical, social) and information on exposures and potential confounders<br>(b) Indicate number of participants with missing data for each variable of interest                                                                                                                                                                               |
| Outcome data                 | 15*✓     | Report numbers of outcome events or summary measures                                                                                                                                                                                                                                                                                                                                                          |
| Main results                 | 16✓      | (a) Give unadjusted estimates and, if applicable, confounder-adjusted estimates and their precision (eg, 95% confidence interval). Make clear which confounders were adjusted for and why they were included<br>(b) Report category boundaries when continuous variables were categorized<br>(c) If relevant, consider translating estimates of relative risk into absolute risk for a meaningful time period |
| Other analyses               | 17       | Report other analyses done—eg analyses of subgroups and interactions, and sensitivity analyses                                                                                                                                                                                                                                                                                                                |

|                          |     |                                                                                                                                                                            |
|--------------------------|-----|----------------------------------------------------------------------------------------------------------------------------------------------------------------------------|
| <b>Discussion</b>        |     |                                                                                                                                                                            |
| Key results              | 18✓ | Summarise key results with reference to study objectives                                                                                                                   |
| Limitations              | 19✓ | Discuss limitations of the study, taking into account sources of potential bias or imprecision. Discuss both direction and magnitude of any potential bias                 |
| Interpretation           | 20✓ | Give a cautious overall interpretation of results considering objectives, limitations, multiplicity of analyses, results from similar studies, and other relevant evidence |
| Generalisability         | 21✓ | Discuss the generalisability (external validity) of the study results                                                                                                      |
| <b>Other information</b> |     |                                                                                                                                                                            |
| Funding                  | 22✓ | Give the source of funding and the role of the funders for the present study and, if applicable, for the original study on which the present article is based              |

\*Give information separately for exposed and unexposed groups.

**Note:** An Explanation and Elaboration article discusses each checklist item and gives methodological background and published examples of transparent reporting. The STROBE checklist is best used in conjunction with this article (freely available on the Web sites of PLoS Medicine at <http://www.plosmedicine.org/>, Annals of Internal Medicine at <http://www.annals.org/>, and Epidemiology at <http://www.epidem.com/>). Information on the STROBE Initiative is available at [www.strobe-statement.org](http://www.strobe-statement.org).



**Evidence base for an intervention to maximise uptake of glaucoma testing: A theory-based cross-sectional survey**

|                                 |                                                                                                                                                                                                                                                                                                                                                                                                                                                                 |
|---------------------------------|-----------------------------------------------------------------------------------------------------------------------------------------------------------------------------------------------------------------------------------------------------------------------------------------------------------------------------------------------------------------------------------------------------------------------------------------------------------------|
| Journal:                        | <i>BMJ Open</i>                                                                                                                                                                                                                                                                                                                                                                                                                                                 |
| Manuscript ID:                  | bmjopen-2011-000710.R1                                                                                                                                                                                                                                                                                                                                                                                                                                          |
| Article Type:                   | Research                                                                                                                                                                                                                                                                                                                                                                                                                                                        |
| Date Submitted by the Author:   | 26-Jan-2012                                                                                                                                                                                                                                                                                                                                                                                                                                                     |
| Complete List of Authors:       | Prior, Maria; University of Aberdeen, Health Services Research Unit<br>Burr, Jennifer; University of Aberdeen, Health Services Research Unit<br>Ramsay, Craig; University of Aberdeen, Health Services Research Unit<br>Jenkinson, David; University of Birmingham, School of Health & Population Sciences<br>Campbell, Susan; University of East Anglia, School of Nursing Sciences<br>Francis, Jillian; University of Aberdeen, Health Services Research Unit |
| <b>Primary Subject Heading</b>: | Health services research                                                                                                                                                                                                                                                                                                                                                                                                                                        |
| Secondary Subject Heading:      | Ophthalmology                                                                                                                                                                                                                                                                                                                                                                                                                                                   |
| Keywords:                       | Glaucoma < OPHTHALMOLOGY, Health behaviour, Screening behaviour, Intention, Planned behaviour, Behavioural self-regulation                                                                                                                                                                                                                                                                                                                                      |
|                                 |                                                                                                                                                                                                                                                                                                                                                                                                                                                                 |

SCHOLARONE™  
Manuscripts

1  
2  
3  
4  
5  
6  
7  
8  
9  
10  
11  
12  
13  
14  
15  
16  
17  
18  
19  
20  
21  
22  
23  
24  
25  
26  
27  
28  
29  
30  
31  
32  
33  
34  
35  
36  
37  
38  
39  
40  
41  
42  
43  
44  
45  
46  
47  
48  
49  
50  
51  
52  
53  
54  
55  
56  
57  
58  
59  
60

**Evidence base for an intervention to maximise uptake of glaucoma testing: A theory-based cross-sectional survey.**

Maria Prior *Research Fellow in Health Services Research*<sup>1</sup>, Jennifer M Burr *Senior Clinical Research Fellow (Ophthalmology)*<sup>1</sup>, Craig R Ramsay *Professor in Healthcare Assessment*<sup>1</sup>, David Jenkinson *Research Fellow in Statistics*<sup>2</sup>, Susan Campbell *Lecturer in Health Services Research*<sup>3</sup>, Jillian J Francis *Professor of Health Psychology*<sup>1</sup> for the Glaucoma screening Platform Study group

<sup>1</sup> Health Services Research Unit, University of Aberdeen, 3<sup>rd</sup> floor Health Sciences Building, Foresterhill, Aberdeen AB25 2ZD, UK

<sup>2</sup> School of Health & Population Sciences, 1<sup>st</sup> Floor, 90 Vincent Drive, University of Birmingham, Edgbaston, Birmingham, B15 2TT, UK

<sup>3</sup> School of Nursing Sciences, Edith Cavell Building, University of East Anglia, Norwich Research Park, Norwich NR4 7TJ, UK

Correspondence to: Jill Francis [j.francis@abdn.ac.uk](mailto:j.francis@abdn.ac.uk) Tel: 01224 438145 Fax: 01224 438165

**KEYWORDS**

Glaucoma; health behaviour; screening behaviour; intention; planned behaviour; behavioural self-regulation

**ABSTRACT**

**Objective.** To identify factors associated with intention to attend a hypothetical eye health test, and provide an evidence base for developing an intervention to maximise attendance, for use in studies evaluating glaucoma screening programmes.

**Design.** Theory-based cross-sectional survey, based on an extended Theory of Planned Behaviour (TPB) and the Common Sense Self-Regulation Model (CS-SRM), conducted in June 2010.

**Participants.** General population including oversampling from low socioeconomic areas.

**Setting.** Aberdeenshire and the London Boroughs of Lewisham and Southwark; UK.

**Results.** From 867 questionnaires posted, 327 questionnaires were returned completed (38%). In hierarchical regression analysis the three theoretical predictors in the Theory of Planned Behaviour (Attitude, Subjective norm and Perceived Behavioural Control) accounted for two-thirds of the variance in intention scores (adjusted  $R^2=0.65$ ). All three predictors

1  
2  
3  
4  
5  
6  
7  
8  
9  
10  
11  
12  
13  
14  
15  
16  
17  
18  
19  
20  
21  
22  
23  
24  
25  
26  
27  
28  
29  
30  
31  
32  
33  
34  
35  
36  
37  
38  
39  
40  
41  
42  
43  
44  
45  
46  
47  
48  
49  
50  
51  
52  
53  
54  
55  
56  
57  
58  
59  
60

contributed significantly to prediction. Adding Anticipated regret as a factor in the TPB model resulted in a significant increase in prediction (adjusted  $R^2=0.74$ ). In the CS-SRM, only illness representations about the personal consequences of glaucoma (*How much do you think glaucoma would affect your life?*) and illness concern (*How concerned are you about getting glaucoma?*) significantly predicted. The final model explained 75% of the variance in intention scores, with ethnicity significantly contributing to prediction.

**Conclusions** In this population-based sample (including over-representation of lower socioeconomic groupings), the predictors of intention to attend a hypothetical eye health test were Attitude, Perceived control over attendance, Anticipated regret if did not attend, and black ethnicity. This evidence informs the design of a behavioural intervention with intervention components targeting low intentions and predicted to influence health related behaviours.

## ARTICLE SUMMARY

### Article focus

- The current UK practice of opportunistic case finding during routine sight tests misses a majority of those with glaucoma. Early detection and treatment of glaucoma reduces the risk of blindness.
- The feasibility and cost-effectiveness of screening programmes is largely determined by uptake by the target population.
- This study identified empirical evidence, based on models of behaviour change, to inform the design of an intervention to maximise uptake.

### Key messages

- Intention to attend an eye health check to detect glaucoma is associated with positive Attitude, perceived control over screening attendance, Anticipated regret if test is not attended, perceived consequences of glaucoma and black ethnicity. These factors can be targeted in an intervention to maximise uptake.

### Strengths and limitations of this study

- This study is the largest of its kind and uses a robust methodology based on plausible models of change to identify potential barriers to attendance for eye care.
- The response rate was 38%, which is higher than generally achieved in similar population-based surveys.

1  
2  
3  
4  
5  
6  
7  
8  
9  
10  
11  
12  
13  
14  
15  
16  
17  
18  
19  
20  
21  
22  
23  
24  
25  
26  
27  
28  
29  
30  
31  
32  
33  
34  
35  
36  
37  
38  
39  
40  
41  
42  
43  
44  
45  
46  
47  
48  
49  
50  
51  
52  
53  
54  
55  
56  
57  
58  
59  
60

- There was evidence to suggest that this sample was representative of the target population (general population with over-representation of Black ethnicity or of low socio-economic status).

For peer review only

## INTRODUCTION

1  
2  
3  
4  
5  
6  
7  
8  
9  
10  
11  
12  
13  
14  
15  
16  
17  
18  
19  
20  
21  
22  
23  
24  
25  
26  
27  
28  
29  
30  
31  
32  
33  
34  
35  
36  
37  
38  
39  
40  
41  
42  
43  
44  
45  
46  
47  
48  
49  
50  
51  
52  
53  
54  
55  
56  
57  
58  
59  
60

Glaucoma is a leading cause of avoidable and irreversible blindness worldwide.[1] In the UK, glaucoma is second to macular degeneration as the most common cause of blindness. If glaucoma is identified early, treatment is effective at reducing progressive disease.[2] It is estimated, based on a synthesis of the available evidence, that the current UK practice of opportunistic case finding during routine sight tests misses a majority of those with glaucoma.[3] Identified risk factors for developing the most common form of glaucoma (open angle glaucoma) include: age (> 60 years), family history of glaucoma in a first degree relative, myopia, diabetes and black ethnicity.[3] Late presentation, older age and poor adherence to treatment are important determinants of blindness.[4-6] Late presentation may be due to patient delay in terms of attendance for testing, process delay in terms of missed diagnosis, or system delay leading to delayed access to treatment.[7] There is evidence to suggest that uptake of eye care services may be lower in groups at risk of glaucoma blindness. In the UK, uptake of current eye care services is lower in black ethnic groups (38% of those aged 55 years and over, compared to 80% of the same age group in the general population).[8] In addition, lower socioeconomic groups and/or black and other ethnic minority groups are less likely to attend for health promotion and preventative services more generally.[9,10]

Considering the public health importance of glaucoma and that early detection and treatment reduce the risk of blindness, a screening programme could be considered.[11] However, there is insufficient evidence from high quality studies that the benefits of glaucoma screening or enhanced case detection programmes outweigh any potential harm (such as raising anxiety levels).[3] Such evidence would be best gathered in the context of a randomised controlled trial (RCT).[11] For public health programmes, a major determinant of both feasibility and cost-effectiveness is the level of uptake by the target population.[12] Uptake involves intentional behaviour (e.g. intend to go to screening appointment) and is likely to be influenced by the way people think (i.e., their cognitions) about the action (attending an eye test) or the condition (glaucoma). We investigated the factors that predict intention to attend an 'eye health test', based on (1) the Theory of Planned Behaviour (TPB) [13] and (2) the Common Sense Self-

1 Regulation Model (CS-SRM).[14] The TPB proposes that intentions are determined by Attitude  
2 (beliefs about whether the benefits outweigh the costs), Subjective norm (perceived normative  
3 pressures) and Perceived control over the behaviour. There is consistent evidence that adding  
4 Anticipated regret as a factor (i.e. beliefs about whether feelings of regret will follow from  
5 inaction) to the TPB model increases prediction of intention and behaviour.[15] The model  
6 including Anticipated Regret is hereafter referred to as the extended TPB model. The CS-SRM  
7 proposes that cognitive representations (a 'mental picture') or emotional representations  
8 (worry or concern) about a health threat lead to behaviours that assist in coping with the  
9 threat. Ideally, an intervention to maximise uptake of a screening programme would be based  
10 on empirical evidence of an association between these cognitive or emotional factors and  
11 intention to attend the eye test, to ensure that the intervention is based on identified (rather  
12 than assumed) barriers to uptake. Therefore we conducted a study to identify the predictors of  
13 intention to attend for eye testing, using the factors proposed by the extended TPB to predict  
14 intention and the factors proposed by the CS-SRM to lead to coping behaviours. Specifically,  
15 we investigated the associations between intention to attend an eye test and:  
16  
17  
18  
19  
20  
21  
22  
23  
24  
25  
26  
27  
28  
29  
30  
31

- 32 1. measures of how people think about attending an 'eye health test' (Intention, Attitude,  
33 Subjective norm, Perceived Behavioural Control, Anticipated regret)
- 34 2. measures of how people think and feel about glaucoma (illness representations i.e.  
35 Consequences, Timeline, Personal control, Treatment control, Identity, Concern,  
36 Coherence, Emotional representation)
- 37 3. other personal attributes (i.e. socio-demographic variables that are known risk factors  
38 for glaucoma and knowledge of glaucoma)

39 Identified predictors would provide an evidence base for developing a behavioural intervention  
40 to maximise uptake of glaucoma screening or enhanced case detection programmes.  
41  
42  
43  
44  
45  
46  
47  
48  
49  
50  
51  
52  
53  
54  
55  
56  
57  
58  
59  
60



## METHODS

### Study design and population

We used a cross sectional survey design to identify factors associated with intention to attend an eye health test, among members of the general population on the edited electoral register in two UK locations: Aberdeenshire (to target a mixture of urban and rural Scottish residents) and the London Boroughs of Lewisham and Southwark (areas with a high Black African/Caribbean population). The initial sample was obtained from a commercial company specialising in the supply of publically available data (names and addresses) for use in research.[16] We requested a sample that was systematically biased towards people over forty years of age, in lower socioeconomic groups and/or of African-Caribbean ethnicity.[3,17] We used the Index of Multiple Deprivation 2007 (IMD) and the Scottish Index of Multiple Deprivation (SIMD) to independently assess the socioeconomic status of the initial sample. These indices provide relative ranking of geographic areas (data zones) within England or Scotland according to levels of deprivation. The IMD is based on 37 different indicators of deprivation, weighted and combined to give a relative ranking for data zones ranging from most deprived (Rank 1) to least deprived (Rank 32482). The SIMD uses different indicators to the IMD, but provides a relative rank for Scottish data zones ranging from most deprived (Rank 1) to least deprived (Rank 6505).

### Materials

We used a questionnaire based on the extended TPB and the CS-SRM to identify factors associated with intention to attend an eye health test. Twenty factors were measured: four from the TPB; eight from the CS-SRM and eight medical and demographic factors (see below). We used the phrase 'new eye health test' and not 'glaucoma screening test' in the questionnaire to minimise anxiety that may be caused if the selected members of the public mistakenly believed that we had approached them after identifying an underlying 'problem' with their eyes.

1 The questionnaire was presented in three sections. Section A contained 18 items based on  
2 the components of the extended TPB (Intention, Attitude, Subjective Norm, Perceived  
3 Behavioural Control and Anticipated regret), with items measured on seven-point response  
4 scales with consistent direction (i.e. high scores indicating high intention, Perceived  
5 Behavioural Control and Anticipated regret, positive Attitude and more positive normative  
6 pressures). Items designed to assess the same construct were separated and presented in a  
7 non-systematic order (in accordance with TPB guidance).[13,18] Examples of Section A items  
8 are shown in Table 1. The full questionnaire is available in supplementary file 1. Section B  
9 (Table 1) assessed illness representations and emotional representations about glaucoma  
10 using items adapted from the Brief Illness Perceptions Questionnaire (Brief IPQ).[19] The Brief  
11 IPQ is a validated questionnaire that measures the components of the CS-SRM that are  
12 proposed to influence health-related coping behaviour. Rewording of items for specific  
13 conditions and for people without a diagnosis are part of the standard use of the questionnaire  
14 [20] and items in Section B were adapted to be appropriate to this study. Each item assesses  
15 a different domain of illness representations, on a 10-point scale, and each is analysed  
16 separately.[19] An item assessing knowledge of the term glaucoma (*Have you heard of the*  
17 *eye condition glaucoma?*) preceded the Brief IPQ items in Section B.

18 Section C of the questionnaire contained socio-demographic and general health items  
19 (gender; general health status; time since last eye test) and items to assess identified risk  
20 factors for glaucoma (age; diabetes, myopia; family history of glaucoma; and ethnicity). In  
21 addition, unique study identification numbers enabled us to identify the location (London or  
22 Aberdeenshire) and socioeconomic status of the invited sample and responders.

23 We pilot tested the questionnaire with two members of the general population to assess  
24 usability and identify any need for clarification of wording. This resulted in changes to the  
25 instruction sheet to emphasise our interest in the honest opinions of participants and not  
26 socially desirable responses.

## 27 Procedure

1 The questionnaire was mailed to 867 potential participants (421 in London and 446 in  
2 Aberdeenshire) in June 2010 together with an information letter (see supplementary file 2) and  
3 reply paid envelope. One reminder was sent to non-responders two weeks later. The return of  
4 a completed questionnaire was considered as consent to take part. Ethical approval for the  
5 survey was obtained from the University of Aberdeen College of Life Sciences and Medicine  
6 Ethics Review Board (Ref: CERB/2010/4/507). The postal survey reported in this paper  
7 formed part of a larger study to assess the feasibility of conducting a RCT of glaucoma  
8 screening.[21]

### 19 **Sample size and statistical analyses**

20 Multiple regression approaches were used to identify factors associated with intention to  
21 attend a hypothetical eye health test. The recommended minimum sample is calculated as 50  
22 + 8m, where m is the number of predictor variables.[22] This study design involved a total of  
23 20 potential predictor variables and the minimum sample size required was thus 210. The  
24 internal consistency of each multi-item measure was assessed using Cronbach's alpha (for  
25 measures with three or more items) and Pearson's correlation coefficient (for the 2-item  
26 measure of Anticipated regret), using an acceptability criterion of  $\alpha > 0.65$ , and  $r > 0.5$   
27 respectively.[23] In addition, measures of central tendency and dispersion were computed for  
28 measures in Sections A and B.

29 The primary analysis addressed the prediction of intention to attend an eye health test. A 4-  
30 step hierarchical regression analysis explored the predictive value of (1) the TPB measures;  
31 (2) Anticipated regret; (3) the Brief IPQ measures and (4) socio-demographic and general  
32 health variables in explaining variance in participants' intention to attend a test. Variables that  
33 did not contribute significantly to the model ( $p > 0.05$ ) at their point of entry were excluded in  
34 later steps. The TPB constructs were entered at Step 1 as these are proposed by the theory  
35 to be the proximal predictors of intention. Anticipated regret was added at Step 2 as this  
36 variable represents an extension of the TPB. Step 3 involved the addition of the Brief IPQ  
37 items (as they represent cognitions at a more contextual level). At Step 4, demographic and  
38 general health variables were added (as they represent the broader personal context in which  
39

1 screening behaviour would be performed). Prior to inclusion in the model, independent-sample  
2  
3  
4 t-tests were performed to compare intention scores of dichotomised demographic and general  
5  
6 health variables. Only those variables for which there was a significant difference in intention  
7  
8 scores were added to the regression model at Step 4. There was no imputation of missing  
9  
10 data.

## 11 12 13 14 15 16 **RESULTS**

### 17 18 **Response rates and responder characteristics**

19  
20 Of the 867 questionnaires sent out, 327 completed questionnaires were returned, representing  
21  
22 a response rate of 38%. The response rate differed by geographical area with London  
23  
24 achieving 24% (101/421) and Aberdeenshire 51% (226/446). **However, the areas did not differ**  
25  
26 **on the key variable we were attempting to predict (intention) ( $p=0.084$ ) so we combined the**  
27  
28 **two samples for the primary analysis.** Of the 11,445 possible data points in the returned  
29  
30 questionnaire, 2.1% of data were missing. The mean (sd) age of respondents was 54 (12)  
31  
32 years. The socioeconomic status of respondents, in both locations was representative of those  
33  
34 sampled and achieved the desired weighting towards people in lower socioeconomic groups:  
35  
36 mean IMD rank of the London sample was 4818 versus 4809 for respondents; mean SIMD of  
37  
38 the Aberdeenshire sample was 2818 versus 2914 for respondents. The most commonly  
39  
40 reported health status was 'good' (41%). Ten percent of the sample reported Black ethnicity  
41  
42 (Table 2) and 81% reported having an eye test within the previous three years.

43  
44 Table 2 here

45  
46  
47 Internal consistency of the extended TPB measures was satisfactory with reliabilities  
48  
49 (Cronbach's alpha) of the Intention, Attitude, Subjective norm and Perceived Behavioural  
50  
51 Control scales > 0.65 and the Anticipated regret scale > 0.5 (Pearson correlation coefficient).  
52  
53 Summary statistics for each variable are shown in Table 3. All variables representing the  
54  
55 extended TPB had medians > 6.3 (on a scale of 1 to 7) suggesting potential ceiling effects  
56  
57 (generally positive views and intentions). Although intention was generally high (Figure 1),  
58  
59  
60

1 there was still a substantial proportion of respondents (54.7%) who reported a mean intention  
2 score < 7, indicating some reservation in their intention to attend. All measures of the CS-  
3 SRM variables, apart from Treatment control, had medians > 5 (on a scale of 1 to 10),  
4  
5 representing generally negative representations about glaucoma (Table 3).  
6  
7  
8  
9

10 Table 3 here

11 Figure 1 here

12  
13 The Pearson correlations between intention to attend an eye health test and the theoretical  
14 predictor variables are shown in Table 3. Higher intention to attend was significantly  
15 associated with all the predictors as proposed by the theories.  
16  
17  
18  
19  
20  
21

22 Intention scores for groups defined by demographic and general health variables are shown in  
23 Table 4. There was a significant difference in the intention scores for respondents of Black and  
24 non-Black ethnicity and for respondents who reported they had heard of glaucoma compared  
25 with those who had not. Both variables were therefore included in the regression model at  
26 Step 4. The other five variables in Table 4 were excluded. A further risk factor for glaucoma,  
27 the continuous variable 'age', was also entered at Step 4 as it was highly correlated with  
28 intention to attend an eye health screening test (Spearman's rank correlation coefficient =  
29 0.155, p=0.006).  
30  
31  
32  
33  
34  
35  
36  
37  
38  
39

40 Table 4 here

41  
42 The results of the hierarchical regression analysis are presented in Tables 5 and 6. At Step 1,  
43 the three theoretical predictors of the TPB (Attitude, Subjective norm and Perceived  
44 Behavioural Control) accounted for two-thirds of the variance in intention scores (adjusted  $R^2$  =  
45 0.65) and all three predictors contributed significantly to prediction. The addition of Anticipated  
46 regret at Step 2 resulted in a significant increase in prediction (adjusted  $R^2$  = 0.74). At Step 3,  
47 only representations about consequences of the condition (*How much do you think glaucoma*  
48 *would affect your life?*) and illness concern (*How concerned are you about getting glaucoma?*)  
49  
50  
51  
52  
53  
54  
55  
56  
57  
58  
59  
60

1 significantly predicted. The final model (Step 4) explained 75% of the variance in intention  
2 scores, with ethnicity significantly contributing to prediction.  
3  
4

5  
6 Tables 5 and 6 here  
7

## 8 **DISCUSSION**

9  
10 This study showed that, in this population-based sample, intention to attend an eye health test  
11 was relatively high and was related to Attitude, Subjective norm, Perceived Behavioural  
12 Control, Anticipated regret, perceived consequences of having glaucoma and ethnicity. In  
13 other words, people who reported that they were *in favour* of attending an eye health test, that  
14 other people would *approve* of their attending, that they would be *able* to attend and that they  
15 would *regret* not attending were more likely to report strong intention to attend such a test.  
16  
17

18 (The effect size for the association between Subjective norm and intention was small, so  
19 Subjective norm will not be considered further). *In this sample, in which lower socio-economic  
20 status was well represented, the theory did better in predicting intention than is usually  
21 reported in the literature (i.e. 65% in this study, 40% frequently reported) demonstrating the  
22 theoretical coherence of the data.[24] People who reported that glaucoma would negatively  
23 affect their life (consequences of glaucoma) were more likely to report strong intention to  
24 attend an eye health test, but the effect size was small. Intention was not uniquely predicted by  
25 knowledge or perceptions about glaucoma, nor was it associated with age when analysed with  
26 the other predictors. However, people of Black ethnicity, known to be at increased risk of  
27 developing glaucoma, were less likely than those of other ethnicities to report strong intention  
28 to attend such a test. This pattern of findings can be used as an evidence base for developing  
29 an intervention to be evaluated in a possible population-based screening trial.*  
30  
31  
32  
33  
34  
35  
36  
37  
38  
39  
40  
41  
42  
43  
44  
45  
46  
47  
48  
49  
50

### 51 **Implications of this evidence base for designing a behavioural component of a complex 52 intervention to improve glaucoma detection**

53 Intention scores were generally high, as were measures of other variables that represented  
54 the way people thought about attending a hypothetical eye health test. The data indicate that a  
55  
56  
57  
58  
59  
60

1 large proportion of this sample was highly receptive to the idea of an eye health programme to  
2 detect glaucoma. Motivation (i.e. high intention [24]) is thus possibly not a barrier to uptake of  
3 a screening programme for the majority of this sample. However, there was still a substantial  
4 proportion of the sample (54.7%) who reported some uncertainty about their intention (i.e.  
5 mean intention score <7) (Figure 1). Thus, an intervention could include components to  
6 increase motivation to attend. The distribution of intention scores (median of 6.7 on a 7-point  
7 scale) also indicated that many in the sample reported that they were highly motivated to re-  
8 arrange other priorities in order to attend a screening test. This is not to say that all people  
9 who strongly intend to attend would actually do so. We were unable to estimate the likely size  
10 of the 'intention-behaviour' gap for attendance at this hypothetical eye health test as a  
11 glaucoma screening programme is not current policy. However, the literature suggests that  
12 around 50% of people who intend to perform a health-related behaviour actually translate that  
13 intention into action.[25] Thus, intervention components could target "post-intentional" (action)  
14 processes to support increased uptake of a screening programme or an enhanced case  
15 detection programme by assisting people to translate their high intentions into actual  
16 behaviour. The inclusion of non-modifiable socio-demographic and general health variables in  
17 the predictive model enabled us to determine that, in addition to targeting modifiable predictors  
18 of intention to attend an eye test, it would be appropriate to develop an intervention that is  
19 tailored to different ethnic groups. However, there was no evidence to suggest that tailoring to  
20 different age groups is warranted.

21  
22  
23  
24  
25  
26  
27  
28  
29  
30  
31  
32  
33  
34  
35  
36  
37  
38  
39  
40  
41  
42  
43  
44 In summary, an intervention to increase uptake could include components to increase  
45 motivation and components to increase action. In addition, tailoring of the intervention to  
46 increase motivation in people of Black ethnicity should be considered (e.g., a letter of invitation  
47 endorsed by a relevant community leader). Methods have recently been reported for  
48 developing interventions based on the evidence reported here.[26] Hence, it would be feasible  
49 to design an intervention to support both (1) motivation to attend and (2) action (attendance for  
50 testing). An intervention to increase motivation could include techniques such as persuasive  
51 communication (e.g., argument in favour of attending, delivered by letter, mass media, or an  
52  
53  
54  
55  
56  
57  
58  
59  
60



1 individual matched to the target group) to target people's beliefs about the benefits of  
2 screening (Attitude, Anticipated regret) and factors likely to make it easier to attend the test  
3 (Perceived Behavioural Control). In addition, prompts and/or reminders (e.g. letters or phone  
4 calls) and contracts (i.e. written and signed agreements to attend) could make actual  
5 attendance more likely among those who are motivated to attend for screening.  
6  
7  
8  
9  
10  
11  
12  
13

#### 14 **Strengths and limitations of the study**

15 This study is the largest of its kind and uses a robust methodology based on plausible models  
16 of change to identify potential barriers to attendance for eye care. We avoided the term  
17 'glaucoma screening' in the participant information sheet and questionnaire, instead using the  
18 phrase 'new eye health tests'. Our purpose was to minimise potential participant anxiety that  
19 they had been specifically targeted in a research study about a serious condition. However,  
20 the use of a generic description of the proposed eye test has generated results that are  
21 applicable to development of interventions for improving attendance at eye care services more  
22 generally.  
23  
24  
25  
26  
27  
28  
29  
30  
31  
32  
33

34 The response rate was 38%, which is higher than generally achieved in similar population-  
35 based surveys.[27,28] There was evidence to suggest that this sample was representative of  
36 the target population (general population with oversampling from low socioeconomic areas).  
37 Furthermore the intention to attend an eye health test did not differ significantly between the  
38 two locations. The proportion of participants reporting having their eyes tested in the last 3  
39 years (81%) was consistent with findings in the general population.[8] The socioeconomic  
40 status and sample characteristics of responders and non-responders suggested that  
41 responders were not distinguishable from non-responders on these variables and the desired  
42 weighting towards people in lower socio-economic groups was achieved. Furthermore, groups  
43 that might be at higher risk of developing glaucoma including hard-to-reach groups were well  
44 represented in the sample. For example, 2.0% of the UK population [29] but 10% of our  
45 sample are of Black ethnicity. In addition, there was a good spread of general health status in  
46  
47  
48  
49  
50  
51  
52  
53  
54  
55  
56  
57  
58  
59  
60



1  
2 the sample, but the proportion reporting excellent health (5.5%) was lower than the UK  
3  
4 average (21.3%).[30]  
5  
6

## 7 8 **CONCLUSION**

9  
10 This study identified that, in a population-based sample (including over-representation of lower  
11 socioeconomic groupings), the predictors of intention to attend for sight testing to detect  
12 glaucoma were Attitude, perceived control over attendance, Anticipated regret if not attended,  
13 and black ethnicity. This evidence will inform the design of a behavioural intervention to  
14 maximise screening uptake. The intervention components that are the likely 'best bets' for  
15 targeting these factors can be selected using a tool systematically developed for this  
16 purpose.[26] This study illustrates the evidence base that is required to inform the  
17 development of interventions to influence health-related behaviours.  
18  
19  
20  
21  
22  
23  
24  
25  
26  
27  
28  
29

30 Funding: This study is one component of a Medical Research Council funded strategic grant,  
31 G0701759: Developing the intervention and outcome components of a proposed randomised  
32 controlled trial of a national screening programme for open angle glaucoma. The Health  
33 Services Research Unit receives a core grant from the Chief Scientist Office of the Scottish  
34 Government Health Directorates. All research was conducted independently of the funders.  
35  
36  
37  
38  
39

40 Acknowledgments: We thank Marion Campbell, Augusto Azuara-Blanco and Jemaima  
41 CheHamzah from the Glaucoma screening Platform Study research group for their  
42 contribution to the development of the larger study and their guidance throughout its conduct.  
43  
44  
45  
46

47 We thank the Glaucoma screening Platform Study advisory panel including R Bativa, D  
48 Crabb, D Garway-Heath, R Hitchings; S McPherson, A Tuulonen, A Viswanathan, R Wormald  
49 for their guidance and contribution to development and oversight of the study and its findings.  
50  
51  
52

53 We also thank Gladys McPherson for providing IT programming support.  
54  
55  
56  
57  
58  
59  
60

1 Competing interests: All authors have completed the Unified Competing Interest form at  
2 www.icmje.org/coi\_disclosure.pdf (available on request from the corresponding author) and  
3  
4 declare that (1) MP, JB, CR, DJ, SC and JF had support for the submitted work through a  
5  
6 Medical Research Council funded strategic grant; (2) no authors have relationships that might  
7  
8 have an interest in the submitted work in the previous 3 years; (3) their spouses, partners, or  
9  
10 children have no financial relationships that may be relevant to the submitted work; and (4) no  
11  
12 authors have non-financial interests that may be relevant to the submitted work.  
13  
14

15  
16  
17 Contributors: At the time of the research all authors were at the University of Aberdeen Health  
18  
19 Services Research Unit. JB, JF and CR had the original ideas for the study. JF, MP JB, SC,  
20  
21 CR developed the questionnaire. MP and SC conducted the data collection. DJ and MP  
22  
23 performed the statistical analysis. MP drafted the paper. All authors participated in the  
24  
25 interpretation of results, revision and approval of the final draft. All authors had full access to  
26  
27 all of the data in the study and can take responsibility for the integrity of the data and the  
28  
29 accuracy of the data analysis. JF is guarantor.  
30

31  
32 The Corresponding Author has the right to grant on behalf of all authors and does grant on  
33  
34 behalf of all authors, a worldwide licence to the Publishers and its licensees in perpetuity, in all  
35  
36 forms, formats and media (whether known now or created in the future), to i) publish,  
37  
38 reproduce, distribute, display and store the Contribution, ii) translate the Contribution into other  
39  
40 languages, create adaptations, reprints, include within collections and create summaries,  
41  
42 extracts and/or, abstracts of the Contribution, iii) create any other derivative work(s) based on  
43  
44 the Contribution, iv) to exploit all subsidiary rights in the Contribution, v) the inclusion of  
45  
46 electronic links from the Contribution to third party material where-ever it may be located; and,  
47  
48 vi) licence any third party to do any or all of the above.  
49

50  
51  
52 Data sharing: No additional data available  
53  
54  
55  
56  
57  
58  
59  
60

1  
2  
3  
4  
5  
6  
7  
8  
9  
10  
11  
12  
13  
14  
15  
16  
17  
18  
19  
20  
21  
22  
23  
24  
25  
26  
27  
28  
29  
30  
31  
32  
33  
34  
35  
36  
37  
38  
39  
40  
41  
42  
43  
44  
45  
46  
47  
48  
49  
50  
51  
52  
53  
54  
55  
56  
57  
58  
59  
60  
**REFERENCES**

- [1] Quigley HA, Broman AT. The number of people with glaucoma worldwide in 2010 and 2020. *Br J Ophthalmol* 2006;90:262-267
- [2] Maier PC, Funk J, Schwarzer G, et al. Treatment of ocular hypertension and open angle glaucoma: Meta-analysis of randomised controlled trials. *Br Med J* 2005 16 Jul;331(7509):134-136
- [3] Burr JM, Mowatt G, Hernandez R, et al. The clinical effectiveness and cost-effectiveness of screening for open angle glaucoma: a systematic review and economic evaluation. *Health Technol Assess* 2007 ix-x, 1-190; Oct;11(41):iii-iv, ix-x, 1-190
- [4] Chen Y, Wyatt HJ, Swanson WH, et al. Rapid pupil-based assessment of glaucomatous damage. *Optometry & Vision Science* 2008 Jun;85(6):471-481
- [5] Grant WM, Burke JF. Why do some people go blind from glaucoma? *Ophthalmology* 1982;89:991-998
- [6] Chen PP. Risk and risk factors for blindness from glaucoma. *Curr Opin Ophthalmol* 2004;15(2):107-11
- [7] Safer MA, Tharps Q,J, Jackson TC, et al. Determinants of Three Stages of Delay in Seeking Care at a Medical Clinic. *Medical care* 1979;17(1):11-29
- [8] Royal National Institute for the Blind. Open Your Eyes. 2005
- [9] Goddard M, Smith P. Equity of access to health care services: Theory and evidence from the UK. *Soc Sci Med* 2001 11;53(9):1149-1162
- [10] Cross V, Shah P, Bativa R, et al. ReGAE 2: glaucoma awareness and the primary eye-care service: some perceptions among African Caribbeans in Birmingham UK. *Eye (London)* 2007;21(7):912-20

- 1 [11] UK National Screening Committee. UK National Screening Committee's Policy Positions.  
2  
3  
4 2009; Available at: <http://www.screening.nhs.uk/criteria>  
5  
6
- 7 [12] Cooke R, French DP. How well do the theory of reasoned action and theory of planned  
8  
9 behaviour predict intentions and attendance at screening programmes? A meta-analysis.  
10  
11 *Psychology and Health* 2008;23(7):745-765  
12  
13
- 14 [13] Ajzen I. The theory of planned behaviour. *Organisational Behaviour and Human Decision*  
15  
16 *Process* 1991;50(1):179-211  
17  
18
- 19 [14] Leventhal H, Nerenz DR, Steele DJ. Illness representations and coping with health  
20  
21 threats. In: Baum A, Taylor SE, Singer JE, eds. Handbook of psychology and health: social  
22  
23 psychological aspects of health. Hillsdale, NJ: Erlbaum; 1984:219-252  
24  
25
- 26 [15] Abraham C, Sheeran P. Acting on intentions: The role of anticipated regret. *British Journal*  
27  
28 *of Social Psychology* 2003;42(4):495-511  
29  
30
- 31 [16] SCS Direct. 2004; Available at:  
32  
33 [http://www.scsdirect.com:8888/webcount\\_v2\\_2/index.jsp??linkname=first](http://www.scsdirect.com:8888/webcount_v2_2/index.jsp??linkname=first)  
34  
35  
36
- 37 [17] Fraser S, Bunce C, Wormald R, et al. Deprivation and late presentation of glaucoma:  
38  
39 Case-control study. *Br Med J* 2001 17 Mar;322(7287):639-643  
40  
41
- 42 [18] Francis JJ, Eccles MP, Johnston M, et al. Constructing questionnaires based on the  
43  
44 theory of planned behaviour: a manual for health services researchers. 2004;ISBN:0-9540161-  
45  
46 5-7  
47  
48
- 49 [19] Broadbent E, Petrie KJ, Main J, et al. The Brief Illness Perception Questionnaire. *Journal*  
50  
51 *of Psychosomatic Research* 2006;60:631-637  
52  
53
- 54 [20] Figueiras MJ, Alves NC. Lay perceptions of serious illnesses: An adapted version of the  
55  
56 Revised Illness Perceptions Questionnaire (IPQ-R) for healthy people. *Psychology and Health*  
57  
58 2007;22(2):143-158  
59  
60



- 1  
2 [21] Glaucoma screening Platform Study group, Burr, JM, Campbell MK, et al. Developing the  
3 clinical components of a complex intervention for a glaucoma screening trial: a mixed methods  
4 study. *BMC Medical Research Methodology* 2011;11(54)  
5  
6  
7  
8  
9 [22] Tabachnik B, Fidell L. Using Multivariate Statistics. New York: Harper Collins; 1996  
10  
11  
12 [23] Nunnally JC, Bernstein IH. Psychometric theory 3rd ed. New York: McGraw-Hill; 1994  
13  
14  
15 [24] Armitage CJ, Conner M. Efficacy of the Theory of Planned Behaviour: A meta-analytic  
16 review. *British Journal of Social Psychology* 2001;40(4):471-499  
17  
18  
19  
20 [25] Sheeran P. Intention—Behavior Relations: A Conceptual and Empirical Review. *European*  
21 *Review of Social Psychology* 2002;12(1):1-36  
22  
23  
24  
25 [26] Michie S, Johnston M, Francis J, et al. From Theory to Intervention: Mapping Theoretically  
26 Derived Behavioural Determinants to Behaviour Change Techniques. *Appl Psychol*  
27  
28 2008;57(4):660-680  
29  
30  
31  
32 [27] Alkerwi A, Sauvageot N, Donneau A, et al. First nationwide survey on cardiovascular risk  
33 factors in Grand-Duchy of Luxembourg (ORISCAV-LUX). *BMC Public Health* 2010;10(468)  
34  
35  
36  
37 [28] Palmer RC, Emmons KM, Fletcher RH, et al. Familial risk and colorectal cancer screening  
38 health beliefs and attitudes in an insured population. *Prev Med* 2007 11;45(5):336-341  
39  
40  
41  
42 [29] Office for National Statistics. Ethnicity and Identity - Census 2001 Key Statistics. Available  
43 at: [http://www.ons.gov.uk/ons/downloads/theme\\_compensia/foe2004/ethnicity.pdf](http://www.ons.gov.uk/ons/downloads/theme_compensia/foe2004/ethnicity.pdf). Accessed  
44  
45  
46  
47 September 21, 2011  
48  
49  
50 [30] Taylor MF, Brice J, Buck N, et al. British Household Panel Survey User Manual Volume A:  
51 Introduction, Technical Report and Appendices.  
52  
53  
54  
55  
56  
57  
58  
59  
60

Table 1 Sample questionnaire items designed to assess theoretical predictors.

| Section A                                                           | Items designed to measure each component                                                                                 | Response options                                                                             |
|---------------------------------------------------------------------|--------------------------------------------------------------------------------------------------------------------------|----------------------------------------------------------------------------------------------|
| Dependent variable:<br>Intention<br>(Items: A1, A8, A17)            | <i>If I received a letter inviting me to attend for an eye health test I would attend</i>                                | Strongly disagree (1) to<br>Strongly agree (7)                                               |
| Predictors:                                                         |                                                                                                                          |                                                                                              |
| Attitude<br>(Items A21A-<br>A21F)                                   | <i>For me, attending an eye health test would be...</i>                                                                  | not worthwhile (1) to worthwhile (7)<br>bad use of my time (1) to good use of my<br>time (7) |
| Subjective Norm<br>(Items A6,A19,<br>A20)                           | <i>Most people who are important to me would think<br/>that I should attend an eye health test</i>                       | Strongly disagree (1) to<br>Strongly agree (7)                                               |
| Perceived<br>Behavioural<br>Control<br>(Items A5, A14,<br>A15, A22) | <i>Whether I attend an eye health test would be<br/>entirely up to me</i>                                                | Strongly disagree (1) to<br>Strongly agree (7)                                               |
| Anticipated<br>Regret<br>(Items: A7, A18)                           | <i>If I was invited for an eye health test and I did<br/>not attend I would later wish I had.</i>                        | Strongly disagree (1) to<br>Strongly agree (7)                                               |
| Section B<br>(Items B2- B9)                                         |                                                                                                                          | 10-point response options                                                                    |
| Consequences                                                        | <i>How much do you think glaucoma would affect<br/>your life?</i>                                                        | No effect at all (1) to Would severely affect<br>my life (10)                                |
| Timeline                                                            | <i>How long do you think glaucoma lasts?</i>                                                                             | Very short time (1) to Forever (10)                                                          |
| Personal Control                                                    | <i>Once a person has been diagnosed with<br/>glaucoma, how much control do you think they<br/>have over the disease?</i> | Extreme amount of control (1) to Absolutely<br>no control (10)                               |
| Treatment Control                                                   | <i>How helpful do you think treatment is for<br/>glaucoma?</i>                                                           | Extremely helpful (1) to Not at all (10)                                                     |
| Identity                                                            | <i>How much do you think a person with glaucoma<br/>would experience symptoms</i>                                        | No symptoms at all (1) to Many sever<br>symptoms (10)                                        |
| Concern                                                             | <i>How concerned are you about getting glaucoma?</i>                                                                     | Not at all concerned (1) to Extremely<br>concerned (10)                                      |
| Coherence                                                           | <i>How well do you feel you understand glaucoma?</i>                                                                     | Understand very clearly (1) to Don't<br>understand at all (10)                               |
| Emotional<br>Representation                                         | <i>How much does the possibility of getting<br/>glaucoma affect you emotionally?</i>                                     | Not at all affected emotionally (1) to<br>Extremely emotionally affected (10)                |

Note: full questionnaire included as a supplementary file

Table 2 Sample characteristics from both locations

| Sample characteristic                                      | n   | (%)    |
|------------------------------------------------------------|-----|--------|
| <b>Male</b>                                                | 143 | (43.7) |
| <b>General Health Status</b>                               |     |        |
| Excellent                                                  | 18  | (5.5)  |
| Very Good                                                  | 79  | (24.2) |
| Good                                                       | 134 | (41.0) |
| Fair                                                       | 71  | (21.7) |
| Poor                                                       | 18  | (5.5)  |
| <b>Heard of the term glaucoma</b>                          | 280 | (85.6) |
| <b>Last Eye Test within 3 years</b>                        | 265 | (81.0) |
| <b>Black Ethnicity</b> (Black British, Caribbean, African) | 33  | (10.1) |
| <b>Diabetic</b>                                            | 37  | (11.3) |
| <b>Short-sighted</b>                                       | 144 | (44.0) |
| <b>Family history of glaucoma</b>                          | 53  | (16.2) |

Table 3 Summary statistics for theory-based variables in the analysis including correlations with intention scores.

| Section & Factor                                             | Mean (sd) | Median (Q1, Q3)  | Pearson correlation with intention score |
|--------------------------------------------------------------|-----------|------------------|------------------------------------------|
| Section A: Attending an eye health test                      |           |                  |                                          |
| Intention                                                    | 6.3 (1.0) | 6.7 (6.0, 7.0)   |                                          |
| Attitude                                                     | 6.3 (1.0) | 6.7 (6.0, 7.0)   | 0.67**                                   |
| Subjective Norm                                              | 6.0 (1.2) | 6.3 (5.3, 7.0)   | 0.59**                                   |
| Perceived Behavioural Control                                | 6.3 (0.8) | 6.5 (6.0, 7.0)   | 0.71**                                   |
| Anticipated Regret                                           | 6.0 (1.2) | 6.5 (5.5, 7.0)   | 0.76**                                   |
| Section B: Illness and emotional representations of glaucoma |           |                  |                                          |
| Consequences                                                 | 8.6 (1.9) | 9.5 (8.0, 10.0)  | 0.44**                                   |
| Timeline                                                     | 8.6 (2.0) | 10.0 (8.0, 10.0) | 0.24**                                   |
| Personal control                                             | 6.2 (2.7) | 6.0 (4.0, 8.0)   | -0.43                                    |
| Treatment control                                            | 3.2 (2.4) | 3.0 (1.0, 5.0)   | 0.28**                                   |
| Identity                                                     | 6.8 (2.4) | 7.0 (5.0, 8.5)   | 0.17**                                   |
| Illness concern                                              | 7.3 (2.8) | 8.0 (5.0, 10.0)  | 0.35**                                   |
| Coherence                                                    | 6.6 (2.7) | 7.0 (5.0, 9.0)   | 0.16**                                   |
| Emotional representation                                     | 6.0 (2.8) | 6.0 (4.0, 8.0)   | 0.25**                                   |

Note: Scales ranged from: (1) negative intention/belief to (7) positive intention/belief (Section A); (1) positive representation of glaucoma to (10) negative representation of glaucoma (Section B).  
\*\*p<0.01



Table 4 Independent sample t-tests on intention scores.

|                            |                             | N <sup>#</sup> | Mean Intention Score | SD   | t    | p       |
|----------------------------|-----------------------------|----------------|----------------------|------|------|---------|
| Heard of glaucoma          | Yes                         | 280            | 6.33                 | 0.91 | 2.04 | 0.047** |
|                            | No                          | 44             | 5.87                 | 1.43 |      |         |
| Gender                     | Male                        | 143            | 6.28                 | 0.88 | 0.17 | 0.868   |
|                            | Female                      | 177            | 6.30                 | 1.05 |      |         |
| Ethnicity                  | All Black ethnicities       | 33             | 5.80                 | 1.51 | 2.05 | 0.048** |
|                            | All other ethnicities       | 281            | 6.35                 | 0.87 |      |         |
| Diabetes                   | Yes                         | 37             | 6.41                 | 0.98 | 0.71 | 0.476   |
|                            | No                          | 278            | 6.29                 | 0.96 |      |         |
| Last eye test              | Within the last 3 years     | 265            | 6.29                 | 1.00 | 0.17 | 0.867   |
|                            | More than 3 years ago/never | 56             | 6.31                 | 0.86 |      |         |
| Short-sighted              | Yes                         | 144            | 6.30                 | 0.91 | 0.84 | 0.402†  |
|                            | No                          | 107            | 6.19                 | 1.14 |      |         |
|                            | Don't know                  | 61             | 6.44                 | 0.82 |      |         |
| Family history of Glaucoma | Yes                         | 53             | 6.43                 | 0.69 | 1.11 | 0.269†  |
|                            | No                          | 172            | 6.27                 | 1.00 |      |         |
|                            | Don't know                  | 94             | 6.30                 | 0.99 |      |         |

# Numbers for each variable do not add up to 327 as some participants did not provide the information

† The test was between "yes" and "no" with those answering "don't know" left out. When the t-tests were repeated with the variables coded dichotomously (yes versus 'not yes') the t-tests remained non-significant.

1  
2  
3  
4  
5  
6  
7  
8  
9  
10  
11  
12  
13  
14  
15  
16  
17  
18  
19  
20  
21  
22  
23  
24  
25  
26  
27  
28  
29  
30  
31  
32  
33  
34  
35  
36  
37  
38  
39  
40  
41  
42  
43  
44  
45  
46  
47  
48  
49  
50  
51  
52  
53  
54  
55  
56  
57  
58  
59  
60

Table 5 Hierarchical regression model summary for predicting intention to attend and eye test.

| Model | R <sup>2</sup> | R <sup>2</sup> Change | p-value |
|-------|----------------|-----------------------|---------|
| 1     | 0.651          | 0.651                 | <0.001  |
| 2     | 0.738          | 0.088                 | <0.001  |
| 3     | 0.747          | 0.009                 | 0.006   |
| 4     | 0.752          | 0.004                 | 0.025   |

For peer review only

Table 6 Coefficients of terms in the final model (Model 4) for predicting intention to attend and eye test.

| Variable                             | Coefficient   | Standard Error | 95% CI          | p-value      |
|--------------------------------------|---------------|----------------|-----------------|--------------|
| (Constant)                           | -0.067        | 0.248          | (-0.556,0.421)  | 0.786        |
| <b>Attitude</b>                      | <b>0.176</b>  | 0.039          | (0.098,0.253)   | <b>0.000</b> |
| <b>Subjective norm</b>               | <b>0.067</b>  | 0.030          | (0.007,0.126)   | <b>0.028</b> |
| <b>Perceived Behavioural Control</b> | <b>0.407</b>  | 0.046          | (0.316,0.499)   | <b>0.000</b> |
| <b>Anticipated regret</b>            | <b>0.298</b>  | 0.033          | (0.232,0.363)   | <b>0.000</b> |
| <b>Consequences of glaucoma</b>      | <b>0.045</b>  | 0.016          | (0.013,0.078)   | <b>0.006</b> |
| Illness concern                      | 0.016         | 0.011          | (-0.006,0.037)  | 0.153        |
| <b>Black ethnicity</b>               | <b>-0.212</b> | 0.094          | (-0.396,-0.027) | <b>0.025</b> |

Figure 1 Frequency distribution of mean intention scores (possible range 1 – 7).

1  
2  
3  
4  
5  
6  
7  
8  
9  
10  
11  
12  
13  
14  
15  
16  
17  
18  
19  
20  
21  
22  
23  
24  
25  
26  
27  
28  
29  
30  
31  
32  
33  
34  
35  
36  
37  
38  
39  
40  
41  
42  
43  
44  
45  
46  
47  
48  
49  
50  
51  
52  
53  
54  
55  
56  
57  
58  
59  
60



Figure 1 Frequency distribution of mean intention scores  
194x158mm (72 x 72 DPI)



Study No

|   |  |  |  |  |  |
|---|--|--|--|--|--|
| 1 |  |  |  |  |  |
| 2 |  |  |  |  |  |

3  
4  
5  
6  
7  
8  
9  
10  
11  
12  
13  
14  
15  
16  
17  
18  
19  
20  
21  
22  
23  
24  
25  
26  
27  
28  
29  
30  
31  
32  
33  
34  
35  
36  
37  
38  
39  
40  
41  
42  
43  
44  
45  
46  
47  
48  
49  
50  
51  
52  
53  
54  
55  
56  
57  
58  
59  
60

# New Eye Health Tests

## Questionnaire

**Thank you for taking the time to help us with this study**

**Confidential**

The aim of this study is to find out your views on possible new NHS eye health tests.

1  
2 These tests would be a separate service to the routine eyesight tests currently offered at High Street  
3 Opticians.

4  
5  
6 Your answers to this questionnaire will help us to identify how best to offer new NHS eye health tests.  
7

8  
9 Unfortunately, we are not able to invite you to attend an eye health test as part of this study.

10  
11 We are just asking for your views.  
12  
13  
14

15  
16  
17 **HOW TO FILL IN THIS QUESTIONNAIRE**

18  
19 We are interested in **your own personal views**, not what you think we want to hear.  
20 There are no right or wrong answers.  
21

22  
23 Most questions can be answered by **ticking** the appropriate box (ONE box only)  
24

25 For example

|    |    |                      |                          |                                     |                          |                          |                          |                          |                          |                |
|----|----|----------------------|--------------------------|-------------------------------------|--------------------------|--------------------------|--------------------------|--------------------------|--------------------------|----------------|
| 26 | 27 | 28 Strongly disagree | 1                        | 2                                   | 3                        | 4                        | 5                        | 6                        | 7                        | Strongly agree |
| 29 | 30 |                      | <input type="checkbox"/> | <input checked="" type="checkbox"/> | <input type="checkbox"/> |                |

31  
32  
33  
34 If you make a mistake, shade out the wrong box and tick the correct one like this

|    |    |                      |                          |                                     |                          |                                     |                          |                          |                          |                |
|----|----|----------------------|--------------------------|-------------------------------------|--------------------------|-------------------------------------|--------------------------|--------------------------|--------------------------|----------------|
| 35 | 36 | 37 Strongly disagree | 1                        | 2                                   | 3                        | 4                                   | 5                        | 6                        | 7                        | Strongly agree |
| 38 | 39 |                      | <input type="checkbox"/> | <input checked="" type="checkbox"/> | <input type="checkbox"/> | <input checked="" type="checkbox"/> | <input type="checkbox"/> | <input type="checkbox"/> | <input type="checkbox"/> |                |

40  
41  
42 All the answers you give are useful to us.

43  
44  
45 Please try to complete the whole questionnaire.  
46  
47  
48  
49  
50  
51  
52  
53  
54  
55  
56  
57  
58  
59  
60



**Section A – YOUR views on eye health tests**

Please tell us what **YOU** think about eye health tests.

*For each question choose a number between 1 and 7 that best reflects your views (Tick ONE box only)*

1  
2  
3  
4  
5  
6  
7  
8  
9  
10  
11  
12  
13  
14  
15  
16  
17  
18  
19  
20  
21  
22  
23  
24  
25  
26  
27  
28  
29  
30  
31  
32  
33  
34  
35  
36  
37  
38  
39  
40  
41  
42  
43  
44  
45  
46  
47  
48  
49  
50  
51  
52  
53  
54  
55  
56  
57  
58  
59  
60

**A1. If I received a letter inviting me for an eye health test I would attend**

|                          |                          |                          |                          |                          |                          |                          |                          |                       |
|--------------------------|--------------------------|--------------------------|--------------------------|--------------------------|--------------------------|--------------------------|--------------------------|-----------------------|
| <b>Strongly disagree</b> | 1                        | 2                        | 3                        | 4                        | 5                        | 6                        | 7                        | <b>Strongly agree</b> |
|                          | <input type="checkbox"/> |                       |

**A2. If I attend an eye health test it would tell me whether or not I had a problem with my eyes**

|                          |                          |                          |                          |                          |                          |                          |                          |                       |
|--------------------------|--------------------------|--------------------------|--------------------------|--------------------------|--------------------------|--------------------------|--------------------------|-----------------------|
| <b>Strongly disagree</b> | 1                        | 2                        | 3                        | 4                        | 5                        | 6                        | 7                        | <b>Strongly agree</b> |
|                          | <input type="checkbox"/> |                       |

**A3. If I attended an eye health test and it detected a problem with my eyes I would be anxious**

|                          |                          |                          |                          |                          |                          |                          |                          |                       |
|--------------------------|--------------------------|--------------------------|--------------------------|--------------------------|--------------------------|--------------------------|--------------------------|-----------------------|
| <b>Strongly disagree</b> | 1                        | 2                        | 3                        | 4                        | 5                        | 6                        | 7                        | <b>Strongly agree</b> |
|                          | <input type="checkbox"/> |                       |

**A4. If I attend an eye health test, any problems would be picked up early**

|                          |                          |                          |                          |                          |                          |                          |                          |                       |
|--------------------------|--------------------------|--------------------------|--------------------------|--------------------------|--------------------------|--------------------------|--------------------------|-----------------------|
| <b>Strongly disagree</b> | 1                        | 2                        | 3                        | 4                        | 5                        | 6                        | 7                        | <b>Strongly agree</b> |
|                          | <input type="checkbox"/> |                       |

**A5. Whether I attend an eye health test would be entirely up to me**

|                          |                          |                          |                          |                          |                          |                          |                          |                       |
|--------------------------|--------------------------|--------------------------|--------------------------|--------------------------|--------------------------|--------------------------|--------------------------|-----------------------|
| <b>Strongly disagree</b> | 1                        | 2                        | 3                        | 4                        | 5                        | 6                        | 7                        | <b>Strongly agree</b> |
|                          | <input type="checkbox"/> |                       |

**A6. Most people who are important to me would think that I should attend an eye health test**

|                          |                          |                          |                          |                          |                          |                          |                          |                       |
|--------------------------|--------------------------|--------------------------|--------------------------|--------------------------|--------------------------|--------------------------|--------------------------|-----------------------|
| <b>Strongly disagree</b> | 1                        | 2                        | 3                        | 4                        | 5                        | 6                        | 7                        | <b>Strongly agree</b> |
|                          | <input type="checkbox"/> |                       |



1  
2  
3  
4  
5  
6  
7  
8  
9  
10  
11  
12  
13  
14  
15  
16  
17  
18  
19  
20  
21  
22  
23  
24  
25  
26  
27  
28  
29  
30  
31  
32  
33  
34  
35  
36  
37  
38  
39  
40  
41  
42  
43  
44  
45  
46  
47  
48  
49  
50  
51  
52  
53  
54  
55  
56  
57  
58  
59  
60

**A7. If I was invited for an eye health test and I did *not* attend I would feel sorry**

Strongly disagree      1      2      3      4      5      6      7      Strongly agree

                                  

**A8. I would make it a high priority to attend an eye health test**

Strongly disagree      1      2      3      4      5      6      7      Strongly agree

                                  

**A9. If I attend an eye health test it would find problems before I notice anything is wrong**

Strongly disagree      1      2      3      4      5      6      7      Strongly agree

                                  

**A10. If I attended an eye health test and it detected a problem with my eyes, the problem could be treated**

Strongly disagree      1      2      3      4      5      6      7      Strongly agree

                                  

**A11. If I attended an eye health test and it detected *no* problems it would give me peace of mind**

Strongly disagree      1      2      3      4      5      6      7      Strongly agree

                                  

**A12. If I attended an eye health test it would pick up additional eye problems to a routine/normal eye sight test**

Strongly disagree      1      2      3      4      5      6      7      Strongly agree

                                  

**A13. If I attend an eye health test it may show up other health problems (e.g. diabetes, high blood pressure)**

Strongly disagree      1      2      3      4      5      6      7      Strongly agree



1  
2  
3  
4  
5  
6  
7

**A14. I am confident that I *could* attend an eye health test if it was available**

|                   |                          |                          |                          |                          |                          |                          |                          |                |
|-------------------|--------------------------|--------------------------|--------------------------|--------------------------|--------------------------|--------------------------|--------------------------|----------------|
| Strongly disagree | 1                        | 2                        | 3                        | 4                        | 5                        | 6                        | 7                        | Strongly agree |
|                   | <input type="checkbox"/> |                |

8  
9  
10  
11  
12  
13  
14  
15  
16

**A15. The decision to attend an eye health test would be within my control**

|                   |                          |                          |                          |                          |                          |                          |                          |                |
|-------------------|--------------------------|--------------------------|--------------------------|--------------------------|--------------------------|--------------------------|--------------------------|----------------|
| Strongly disagree | 1                        | 2                        | 3                        | 4                        | 5                        | 6                        | 7                        | Strongly agree |
|                   | <input type="checkbox"/> |                |

17  
18  
19  
20  
21  
22  
23  
24  
25  
26

**A16. If I attended an eye health test and it detected a problem with my eyes it could stop me losing my sight**

|                   |                          |                          |                          |                          |                          |                          |                          |                |
|-------------------|--------------------------|--------------------------|--------------------------|--------------------------|--------------------------|--------------------------|--------------------------|----------------|
| Strongly disagree | 1                        | 2                        | 3                        | 4                        | 5                        | 6                        | 7                        | Strongly agree |
|                   | <input type="checkbox"/> |                |

27  
28  
29  
30  
31  
32  
33  
34  
35  
36

**A17. I would rearrange other things in order to attend an eye health test**

|                   |                          |                          |                          |                          |                          |                          |                          |                |
|-------------------|--------------------------|--------------------------|--------------------------|--------------------------|--------------------------|--------------------------|--------------------------|----------------|
| Strongly disagree | 1                        | 2                        | 3                        | 4                        | 5                        | 6                        | 7                        | Strongly agree |
|                   | <input type="checkbox"/> |                |

37  
38  
39  
40  
41  
42  
43  
44  
45

**A18. If I was invited for an eye health test and I did not attend I would later wish I had**

|                   |                          |                          |                          |                          |                          |                          |                          |                |
|-------------------|--------------------------|--------------------------|--------------------------|--------------------------|--------------------------|--------------------------|--------------------------|----------------|
| Strongly disagree | 1                        | 2                        | 3                        | 4                        | 5                        | 6                        | 7                        | Strongly agree |
|                   | <input type="checkbox"/> |                |

46  
47  
48  
49  
50  
51  
52

**A19. My close relatives would want me to attend an eye health test**

|                   |                          |                          |                          |                          |                          |                          |                          |                |
|-------------------|--------------------------|--------------------------|--------------------------|--------------------------|--------------------------|--------------------------|--------------------------|----------------|
| Strongly disagree | 1                        | 2                        | 3                        | 4                        | 5                        | 6                        | 7                        | Strongly agree |
|                   | <input type="checkbox"/> |                |

53  
54  
55  
56  
57  
58  
59  
60

**A20. My friends would want me to attend an eye health test**

|                   |                          |                          |                          |                          |                          |                          |                          |                |
|-------------------|--------------------------|--------------------------|--------------------------|--------------------------|--------------------------|--------------------------|--------------------------|----------------|
| Strongly disagree | 1                        | 2                        | 3                        | 4                        | 5                        | 6                        | 7                        | Strongly agree |
|                   | <input type="checkbox"/> |                |



For each of the following options choose a number between 1 and 7 that best reflects YOUR views (Tick ONE box only)

**A21. For me, attending an eye health test would be...**

|                       |                          |                          |                          |                          |                          |                          |                          |                        |
|-----------------------|--------------------------|--------------------------|--------------------------|--------------------------|--------------------------|--------------------------|--------------------------|------------------------|
| Not worthwhile        | 1                        | 2                        | 3                        | 4                        | 5                        | 6                        | 7                        | Worthwhile             |
|                       | <input type="checkbox"/> |                        |
| Bad use of my time    | 1                        | 2                        | 3                        | 4                        | 5                        | 6                        | 7                        | Good use of my time    |
|                       | <input type="checkbox"/> |                        |
| Unimportant           | 1                        | 2                        | 3                        | 4                        | 5                        | 6                        | 7                        | Important              |
|                       | <input type="checkbox"/> |                        |
| Unpleasant            | 1                        | 2                        | 3                        | 4                        | 5                        | 6                        | 7                        | Pleasant               |
|                       | <input type="checkbox"/> |                        |
| Uninformative         | 1                        | 2                        | 3                        | 4                        | 5                        | 6                        | 7                        | Informative            |
|                       | <input type="checkbox"/> |                        |
| Bad for my eye health | 1                        | 2                        | 3                        | 4                        | 5                        | 6                        | 7                        | Good for my eye health |
|                       | <input type="checkbox"/> |                        |

**A22. Attending an eye health test would be...**

|                  |                          |                          |                          |                          |                          |                          |                          |             |
|------------------|--------------------------|--------------------------|--------------------------|--------------------------|--------------------------|--------------------------|--------------------------|-------------|
| Difficult for me | 1                        | 2                        | 3                        | 4                        | 5                        | 6                        | 7                        | Easy for me |
|                  | <input type="checkbox"/> |             |

**A23. If I was sent an eye health appointment for a specific day and time it would be...**

|                            |                          |                          |                          |                          |                          |                          |                          |                       |
|----------------------------|--------------------------|--------------------------|--------------------------|--------------------------|--------------------------|--------------------------|--------------------------|-----------------------|
| Difficult for me to attend | 1                        | 2                        | 3                        | 4                        | 5                        | 6                        | 7                        | Easy for me to attend |
|                            | <input type="checkbox"/> |                       |

**A24. If an eye health test was available locally (e.g. within 10 miles) it would be...**

|                            |                          |                          |                          |                          |                          |                          |                          |                       |
|----------------------------|--------------------------|--------------------------|--------------------------|--------------------------|--------------------------|--------------------------|--------------------------|-----------------------|
| Difficult for me to attend | 1                        | 2                        | 3                        | 4                        | 5                        | 6                        | 7                        | Easy for me to attend |
|                            | <input type="checkbox"/> |                       |



**A25. If an eye health test was only available during working hours it would be...**

1  
2  
3  
4  
5  
6  
7

|                               |                          |                          |                          |                          |                          |                          |                          |                          |
|-------------------------------|--------------------------|--------------------------|--------------------------|--------------------------|--------------------------|--------------------------|--------------------------|--------------------------|
| Difficult for me<br>to attend | 1                        | 2                        | 3                        | 4                        | 5                        | 6                        | 7                        | Easy for me<br>to attend |
|                               | <input type="checkbox"/> |                          |

**A26. If an eye health test was available during evenings and weekends it would be...**

8  
9  
10  
11  
12  
13  
14  
15  
16

|                               |                          |                          |                          |                          |                          |                          |                          |                          |
|-------------------------------|--------------------------|--------------------------|--------------------------|--------------------------|--------------------------|--------------------------|--------------------------|--------------------------|
| Difficult for me<br>to attend | 1                        | 2                        | 3                        | 4                        | 5                        | 6                        | 7                        | Easy for me<br>to attend |
|                               | <input type="checkbox"/> |                          |

**A27. If the location for the eye health test was a Community Health Centre (GP surgery) it would be ...**

17  
18  
19  
20  
21  
22  
23  
24  
25  
26

|                               |                          |                          |                          |                          |                          |                          |                          |                          |
|-------------------------------|--------------------------|--------------------------|--------------------------|--------------------------|--------------------------|--------------------------|--------------------------|--------------------------|
| Difficult for me<br>to attend | 1                        | 2                        | 3                        | 4                        | 5                        | 6                        | 7                        | Easy for me<br>to attend |
|                               | <input type="checkbox"/> |                          |

**A28. If the location for the eye health test was a High Street Optician it would be...**

27  
28  
29  
30  
31  
32  
33  
34

|                               |                          |                          |                          |                          |                          |                          |                          |                          |
|-------------------------------|--------------------------|--------------------------|--------------------------|--------------------------|--------------------------|--------------------------|--------------------------|--------------------------|
| Difficult for me<br>to attend | 1                        | 2                        | 3                        | 4                        | 5                        | 6                        | 7                        | Easy for me<br>to attend |
|                               | <input type="checkbox"/> |                          |

**A29. Showing up other health problems (e.g. diabetes, high blood pressure) in the eye health test is...**

35  
36  
37  
38  
39  
40  
41  
42  
43  
44

|             |                          |                          |                          |                          |                          |                          |                          |           |
|-------------|--------------------------|--------------------------|--------------------------|--------------------------|--------------------------|--------------------------|--------------------------|-----------|
| Unimportant | 1                        | 2                        | 3                        | 4                        | 5                        | 6                        | 7                        | Important |
|             | <input type="checkbox"/> |           |

**A30. My close relatives' views about me attending an eye health test are important to me**

45  
46  
47  
48  
49  
50  
51  
52  
53

|            |                          |                          |                          |                          |                          |                          |                          |              |
|------------|--------------------------|--------------------------|--------------------------|--------------------------|--------------------------|--------------------------|--------------------------|--------------|
| Not at all | 1                        | 2                        | 3                        | 4                        | 5                        | 6                        | 7                        | Very much so |
|            | <input type="checkbox"/> |              |

**A31. My friends' views about me attending an eye health test are important to me**

54  
55  
56  
57  
58  
59  
60

|            |                          |                          |                          |                          |                          |                          |                          |              |
|------------|--------------------------|--------------------------|--------------------------|--------------------------|--------------------------|--------------------------|--------------------------|--------------|
| Not at all | 1                        | 2                        | 3                        | 4                        | 5                        | 6                        | 7                        | Very much so |
|            | <input type="checkbox"/> |              |



## Section B - Your views on the eye condition glaucoma

B1. Have you heard of the eye condition glaucoma?

Yes

No

For the following questions choose a number between 0 and 10 that best reflects your views (Tick ONE box only)

B2. How much do you think glaucoma would affect your life?

No effect  
at all

|                          |                          |                          |                          |                          |                          |                          |                          |                          |                          |
|--------------------------|--------------------------|--------------------------|--------------------------|--------------------------|--------------------------|--------------------------|--------------------------|--------------------------|--------------------------|
| 1                        | 2                        | 3                        | 4                        | 5                        | 6                        | 7                        | 8                        | 9                        | 10                       |
| <input type="checkbox"/> |

Would  
severely  
affect my life

B3. How long do you think glaucoma lasts?

Very short  
time

|                          |                          |                          |                          |                          |                          |                          |                          |                          |                          |
|--------------------------|--------------------------|--------------------------|--------------------------|--------------------------|--------------------------|--------------------------|--------------------------|--------------------------|--------------------------|
| 1                        | 2                        | 3                        | 4                        | 5                        | 6                        | 7                        | 8                        | 9                        | 10                       |
| <input type="checkbox"/> |

Forever

B4. Once a person has been diagnosed with glaucoma, how much control do you think they have over the disease?

Absolutely  
no control

|                          |                          |                          |                          |                          |                          |                          |                          |                          |                          |
|--------------------------|--------------------------|--------------------------|--------------------------|--------------------------|--------------------------|--------------------------|--------------------------|--------------------------|--------------------------|
| 1                        | 2                        | 3                        | 4                        | 5                        | 6                        | 7                        | 8                        | 9                        | 10                       |
| <input type="checkbox"/> |

Extreme  
amount of  
control

B5. How helpful do you think treatment is for glaucoma?

Not at all

|                          |                          |                          |                          |                          |                          |                          |                          |                          |                          |
|--------------------------|--------------------------|--------------------------|--------------------------|--------------------------|--------------------------|--------------------------|--------------------------|--------------------------|--------------------------|
| 1                        | 2                        | 3                        | 4                        | 5                        | 6                        | 7                        | 8                        | 9                        | 10                       |
| <input type="checkbox"/> |

Extremely  
helpful

B6. How much do you think a person with glaucoma would experience symptoms?

No symptoms  
at all

|                          |                          |                          |                          |                          |                          |                          |                          |                          |                          |
|--------------------------|--------------------------|--------------------------|--------------------------|--------------------------|--------------------------|--------------------------|--------------------------|--------------------------|--------------------------|
| 1                        | 2                        | 3                        | 4                        | 5                        | 6                        | 7                        | 8                        | 9                        | 10                       |
| <input type="checkbox"/> |

Many severe  
symptoms



1  
2 **B7. How concerned are you about getting glaucoma?**  
3  
4 Not at all concerned      1      2      3      4      5      6      7      8      9      10      Extremely concerned  
5                                                              
6  
7

8  
9 **B8. How well do you feel you understand glaucoma?**  
10  
11 Don't understand at all      1      2      3      4      5      6      7      8      9      10      Understand very clearly  
12                                                              
13  
14

15  
16  
17 **B9. How much does the possibility of getting glaucoma affect you emotionally?**  
18  
19 Not at all affected emotionally      1      2      3      4      5      6      7      8      9      10      Extremely affected emotionally  
20                                                              
21  
22  
23  
24

25  
26 **B10. Please list in order of importance the 3 most important factors that you believe cause glaucoma**  
27  
28  
29 1.   
30  
31 2.   
32  
33 3.   
34  
35  
36  
37  
38  
39  
40  
41  
42  
43  
44  
45  
46  
47  
48  
49  
50  
51  
52  
53  
54  
55  
56  
57  
58  
59  
60



## Section C - Can you tell us a little bit about yourself?

1  
2  
3  
4  
5  
6  
7  
8  
9  
10  
11  
12  
13  
14  
15  
16  
17  
18  
19  
20  
21  
22  
23  
24  
25  
26  
27  
28  
29  
30  
31  
32  
33  
34  
35  
36  
37  
38  
39  
40  
41  
42  
43  
44  
45  
46  
47  
48  
49  
50  
51  
52  
53  
54  
55  
56  
57  
58  
59  
60

C1. Are you...

Male Female 

C2. What is your age?

 years

C3. In general, would you say your health is... (please tick one box only)

Excellent

Very Good

Good

Fair

Poor

C4. Ethnic group

Please tick the box that best describes your ethnic group (please tick ONE box only)

White British Mixed – White and Black Caribbean Any other White background Mixed – White and Black African Black or Black British – Black Caribbean Mixed – White and Asian Black or Black British – Black African Any other mixed background Black or Black British  
(Any other Black background) Any other Asian or Asian British Prefer not to answer Chinese 

C5. Do you have diabetes (Type 1 or 2)?

Yes No



**C6. When did you last have your eyes tested?**

Within the last 3 years

More than 10 years ago

Between 3 and 5 years ago

Never

Between 5 and 10 years ago

**C7. Are you short-sighted?**

Yes

No

Don't know

**C8. Is there a history of glaucoma in your family?**

Yes

No

Don't know

**Section D – Would you attend this eye health appointment?**

*Please choose a number between 1 and 7 (Tick ONE box only)*

**D1. Please imagine that you receive a letter inviting you to attend an eye health test. The letter contains the following information:**

- a fixed appointment time that you can change if it is not convenient
- the test will be done at your Community Health Centre (GP surgery)
- the test takes about 15 minutes
- appointments are available outside of working hours

**How certain are you that you would attend this eye health appointment?**

I am certain  
I would *not*  
attend

1

2

3

4

5

6

7

I am certain  
I would  
attend

I am not sure

**End of questionnaire**



1  
2  
3  
4  
5  
6  
7  
8  
9  
10  
11  
12  
13  
14  
15  
16  
17  
18  
19  
20  
21  
22  
23  
24  
25  
26  
27  
28  
29  
30  
31  
32  
33  
34  
35  
36  
37  
38  
39  
40  
41  
42  
43  
44  
45  
46  
47  
48  
49  
50  
51  
52  
53  
54  
55  
56  
57  
58  
59  
60

**Thank you very much for your time and patience in filling in this questionnaire**

The information you have given us will be extremely useful to us

It will be treated with the strictest confidence and kept securely

Please send the questionnaire back to us in Aberdeen in the pre-paid envelope provided

If you would like further information or have any questions about the study, please contact:

The Eye Health Screening Study Co-ordinator – Dr. Maria Prior (Tel: 01224 559800)

This study is taking place across the UK but questionnaires are being processed in Aberdeen at the Health Services Research Unit, University of Aberdeen, Health Sciences Building, Foresterhill, ABERDEEN, AB25 2ZD

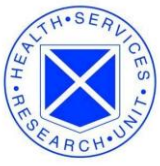

University of Aberdeen  
3<sup>rd</sup> Floor, Health Sciences Building  
Foresterhill  
Aberdeen AB25 2ZD  
Scotland  
United Kingdom

Tel: +44 (0) 1224 59800  
Fax: +44 (0) 1224 554580  
Email: m.e.prior@abdn.ac.uk

## New Eye Health Tests: your views A Questionnaire Study

Dear <<title name>>

We are writing to ask if you will answer some questions as part of an important new study into eye health. Please note, **we are not asking you to have an eye test, only to fill in a questionnaire**. The study is funded by the Medical Research Council and is part of internationally recognised research looking at whether introducing new NHS eye health tests would be worthwhile.

### Why are we doing this study?

Certain eye conditions do not cause obvious symptoms in the early stages. By the time people notice anything is wrong, there may be permanent damage to their vision. We want to find out whether introducing new NHS eye health tests would reduce the number of people who go on to have serious vision problems. These tests would be a separate service to the routine eyesight tests currently offered at High Street Opticians in the UK.

### Why have you been chosen?

We want people like you - who might be invited to have a test if it was available – to give us your personal views about a proposed new NHS eye health test programme. Your answers to the questionnaire will help us to decide how best to design this kind of programme.

This letter is being sent to about 500 people, chosen from the electoral register, in your area.

**Whether you think you have an eye problem or not, we would like you to complete the questionnaire.**

### What do you have to do to take part?

All you will need to do is to complete the enclosed questionnaire and return it in the reply-paid envelope provided. The questionnaire should take about 10 minutes to complete.

**Do you have to take part?**

Taking part is entirely voluntary. If you decide not to take part, please return your blank questionnaire in the reply-paid envelope. However, if we have not heard from you at all after two weeks we will write to you again. If we do not hear from you after the second letter, we will not contact you again.

**Who will know what I say?**

The information you provide will be strictly confidential. Your name will not appear on your questionnaire or anywhere else. The answers you give us will be transferred to a secure computer database that is only accessible to researchers involved in this study. All information will be kept securely within the Health Services Research Unit at the University of Aberdeen for ten years, in line with current Research Governance requirements. It will then be destroyed.

**Is an NHS eye health test available now?**

No. Unfortunately, we are not able to invite you to attend an eye health test as part of this study.

**What are the possible benefits of taking part?**

Taking part in this study will be of no direct benefit to you. However, it may benefit others in the future. We have interviewed several people as part of this study and they have told us they are pleased to be asked their views about new NHS programmes before they are introduced, as this gives them the chance to influence how the health service is run.

If you would like any further information on this study, or have any questions about the study, or about the questionnaire, please do not hesitate to contact Maria Prior at the address above.

Yours sincerely

**Dr Maria Prior**

Study Co-ordinator  
on behalf of the Eye Health Screening Study Team

This study has been approved by the Ethics Review Board of the College of Life Sciences and Medicine of the University of Aberdeen.

STROBE Statement—Checklist of items that should be included in reports of *cross-sectional studies*

|                              | Item No  | Recommendation                                                                                                                                                                                                                                                                                                                                                                                                |
|------------------------------|----------|---------------------------------------------------------------------------------------------------------------------------------------------------------------------------------------------------------------------------------------------------------------------------------------------------------------------------------------------------------------------------------------------------------------|
| <b>Title and abstract</b>    | 1✓<br>✓  | (a) Indicate the study's design with a commonly used term in the title or the abstract<br>(b) Provide in the abstract an informative and balanced summary of what was done and what was found                                                                                                                                                                                                                 |
| <b>Introduction</b>          |          |                                                                                                                                                                                                                                                                                                                                                                                                               |
| Background/rationale         | 2✓       | Explain the scientific background and rationale for the investigation being reported                                                                                                                                                                                                                                                                                                                          |
| Objectives                   | 3✓       | State specific objectives, including any prespecified hypotheses                                                                                                                                                                                                                                                                                                                                              |
| <b>Methods</b>               |          |                                                                                                                                                                                                                                                                                                                                                                                                               |
| Study design                 | 4✓       | Present key elements of study design early in the paper                                                                                                                                                                                                                                                                                                                                                       |
| Setting                      | 5✓       | Describe the setting, locations, and relevant dates, including periods of recruitment, exposure, follow-up, and data collection                                                                                                                                                                                                                                                                               |
| Participants                 | 6✓       | (a) Give the eligibility criteria, and the sources and methods of selection of participants                                                                                                                                                                                                                                                                                                                   |
| Variables                    | 7✓       | Clearly define all outcomes, exposures, predictors, potential confounders, and effect modifiers. Give diagnostic criteria, if applicable                                                                                                                                                                                                                                                                      |
| Data sources/<br>measurement | 8*✓      | For each variable of interest, give sources of data and details of methods of assessment (measurement). Describe comparability of assessment methods if there is more than one group                                                                                                                                                                                                                          |
| Bias                         | 9✓       | Describe any efforts to address potential sources of bias                                                                                                                                                                                                                                                                                                                                                     |
| Study size                   | 10✓      | Explain how the study size was arrived at                                                                                                                                                                                                                                                                                                                                                                     |
| Quantitative variables       | 11✓      | Explain how quantitative variables were handled in the analyses. If applicable, describe which groupings were chosen and why                                                                                                                                                                                                                                                                                  |
| Statistical methods          | 12✓<br>✓ | (a) Describe all statistical methods, including those used to control for confounding<br>(b) Describe any methods used to examine subgroups and interactions<br>(c) Explain how missing data were addressed<br>(d) If applicable, describe analytical methods taking account of sampling strategy<br>(e) Describe any sensitivity analyses                                                                    |
| <b>Results</b>               |          |                                                                                                                                                                                                                                                                                                                                                                                                               |
| Participants                 | 13*✓     | (a) Report numbers of individuals at each stage of study—eg numbers potentially eligible, examined for eligibility, confirmed eligible, included in the study, completing follow-up, and analysed<br>(b) Give reasons for non-participation at each stage<br>(c) Consider use of a flow diagram                                                                                                               |
| Descriptive data             | 14*✓     | (a) Give characteristics of study participants (eg demographic, clinical, social) and information on exposures and potential confounders<br>(b) Indicate number of participants with missing data for each variable of interest                                                                                                                                                                               |
| Outcome data                 | 15*✓     | Report numbers of outcome events or summary measures                                                                                                                                                                                                                                                                                                                                                          |
| Main results                 | 16✓      | (a) Give unadjusted estimates and, if applicable, confounder-adjusted estimates and their precision (eg, 95% confidence interval). Make clear which confounders were adjusted for and why they were included<br>(b) Report category boundaries when continuous variables were categorized<br>(c) If relevant, consider translating estimates of relative risk into absolute risk for a meaningful time period |
| Other analyses               | 17       | Report other analyses done—eg analyses of subgroups and interactions, and sensitivity analyses                                                                                                                                                                                                                                                                                                                |



|                          |     |                                                                                                                                                                            |
|--------------------------|-----|----------------------------------------------------------------------------------------------------------------------------------------------------------------------------|
| <b>Discussion</b>        |     |                                                                                                                                                                            |
| Key results              | 18✓ | Summarise key results with reference to study objectives                                                                                                                   |
| Limitations              | 19✓ | Discuss limitations of the study, taking into account sources of potential bias or imprecision. Discuss both direction and magnitude of any potential bias                 |
| Interpretation           | 20✓ | Give a cautious overall interpretation of results considering objectives, limitations, multiplicity of analyses, results from similar studies, and other relevant evidence |
| Generalisability         | 21✓ | Discuss the generalisability (external validity) of the study results                                                                                                      |
| <b>Other information</b> |     |                                                                                                                                                                            |
| Funding                  | 22✓ | Give the source of funding and the role of the funders for the present study and, if applicable, for the original study on which the present article is based              |

\*Give information separately for exposed and unexposed groups.

**Note:** An Explanation and Elaboration article discusses each checklist item and gives methodological background and published examples of transparent reporting. The STROBE checklist is best used in conjunction with this article (freely available on the Web sites of PLoS Medicine at <http://www.plosmedicine.org/>, Annals of Internal Medicine at <http://www.annals.org/>, and Epidemiology at <http://www.epidem.com/>). Information on the STROBE Initiative is available at [www.strobe-statement.org](http://www.strobe-statement.org).
